# Supplementary material for: Climate model benchmarking with glacial and mid-Holocene climates
Source: Springer Nature journal article supplement (doi:10.1007/s00382-013-1922-6), 2013-08-29
Supplement: 382_2013_1922_MOESM1_ESM.pdf [file 382_2013_1922_MOESM1_ESM.pdf]

## Climate model benchmarking with glacial and mid-Holocene climates: Supplementary Information

Harrison, S.P.<sup>1,2</sup>, Bartlein, P.J.<sup>3</sup>, Brewer, S.<sup>4</sup>, Prentice, I.C.<sup>1,5</sup>, Boyd, M.<sup>6,7</sup>, Hessler, I.<sup>8,1</sup>, Holmgren, K.<sup>6,7</sup>, Izumi, K.<sup>3</sup>, Willis, K.<sup>1</sup>

1: Department of Biological Sciences, Macquarie University, North Ryde, NSW 2109, Australia.

2: Geography & Environmental Sciences, School of Human and Environmental Sciences, Reading University, Whiteknights, Reading, UK

3: Department of Geography, University of Oregon, Eugene, Oregon, USA

4: Geography Department, University of Utah, Salt Lake City, Utah, USA

5: AXA Chair of Biosphere and Climate Impacts, Department of Life Sciences and Grantham Institute for Climate Change, Imperial College, Silwood Park, Ascot SL5 7PY, UK

6: Bert Bolin Centre for Climate Research, Stockholm University, 106 91 Stockholm, Sweden

7: Department of Physical Geography and Quaternary Geology, Stockholm University, 106 91 Stockholm, Sweden

8: MARUM, Centre for Marine Environmental Sciences, University of Bremen, Germany

Correspondence to: [sandy.harrison@mq.edu.au](mailto:sandy.harrison@mq.edu.au)

The SI contains a description of (1) the derivation of the benchmark data sets, (2) the modelling protocol used in PMIP2 and CMIP5 simulation, (3) the processing of model output, (4) the metric statistics, and (5) tables summarizing the metrics for each time period and model.

### 1. Derivation of Benchmark Data Sets

#### 1.1. Bioclimatic variables over land: Bartlein et al. (2011)

There has been a long history of making quantitative climate or bioclimate reconstructions using pollen and plant macrofossil data (Webb and Bryson 1972; Bartlein et al. 1984; Overpeck et al. 1985; Bartlein et al. 1986; Huntley and Prentice 1988), using different statistical methods and inverse modelling. Bartlein et al. (2011) provide a global synthesis by combining and gridding existing regional data sets available for the Mid-Holocene (MH, ca 6000 yr BP) and Last Glacial Maximum (LGM, ca 21,000 yr BP). The original data were screened by applying age-selection and statistical outlier criteria. Bartlein et al. (2011) includes reconstructions of six variables: (1) mean temperature of the warmest month (MTWA), (2) the accumulated temperature sum during the growing season (growing degree days above a baseline temperature for the growth of woody plants of 5°C: GDD5), (3) mean temperature of the coldest month (MTCO), (4) mean annual temperature (MAT), (5) mean annual precipitation (MAP) and (6) the ratio of actual to equilibrium evapotranspiration ( $\alpha$ ). Analyses of these data in the original Bartlein et al. (2011) paper have shown that methodological uncertainties have little impact on the reconstructions: the reconstructed climate variables show large, spatially coherent patterns that are consistent with plausible responses to known climate forcing. Nevertheless, the dataset includes a quantified estimate of the combined uncertainties arising from data

36 resolution and sampling, age scale uncertainties, analytical uncertainties and calibration model uncertainty. To  
37 facilitate comparison with climate-model outputs, the original site-based reconstructions were re-gridded as  
38 anomalies on a regular latitude/longitude grid of 2° by 2° (comparable to the typical grid size of the models). The  
39 grid-cell anomaly value was obtained by simple averaging and grid-cell uncertainty is a pooled estimate of the  
40 standard error. Gridding results in the creation of climate estimates for 715 cells (out of a possible 3,687 non-ice-  
41 covered land cells) at MH and for 153 cells (out of a possible 3,618 non-ice-covered land cells) at LGM.

42

### 43 **1.2. Surface ocean reconstructions: the MARGO data set: MARGO Project Members (2009)**

44 Reconstructions of seasonal sea-surface temperatures (SSTs) and seasonal sea-ice cover at the LGM have been  
45 developed by the MARGO (Multiproxy Approach for the Reconstruction of the Glacial Ocean) project (Kucera et  
46 al. 2005) using biological and geochemical evidence from deep-sea sediments. MARGO initially produced data sets  
47 for different types of records and for different regions, with measurement and statistical uncertainties given for at  
48 each site. Different types of records give different information about surface ocean conditions: for example,  
49 foraminiferal assemblages can be analyzed statistically to yield seasonal variation in SSTs while alkenone data only  
50 provide a measure of mean annual sea-surface temperature. The various data sets were subsequently combined to  
51 provide gridded data sets of summer SST (SSTsum), winter SST (SSTwin), annual SST (SSTann) at 5° by 5°  
52 resolution, where summer is defined as July, August, September in the northern hemisphere and January, February,  
53 March in the southern hemisphere (and vice versa for winter). The gridded data sets were produced by averaging  
54 individual site-based reconstructions that fall into the same cell, weighted by an index of the reliability of each  
55 contributing reconstruction (MARGO Project Members 2009). Uncertainties are calculated from the calibration  
56 error of each proxy, weighted by an index based on dating quality, number of samples and the proxy reliability. This  
57 is aggregated with the standard deviation of climate estimations for all records in a grid cell, to provide an overall  
58 grid uncertainty.

59

60 There are three data sets that provide reconstructions of some aspect of sea ice cover in MARGO. One simply  
61 estimates the extent of winter and summer sea ice based on foraminifer-based SST reconstructions exceeding  
62 specified threshold values (MARGO Project Members 2009). The diatom-based reconstructions for the Southern  
63 Ocean (Gersonde et al. 2005) include estimates of average concentration per month. The dinoflagellate data set for  
64 the North Atlantic (de Vernal et al. 2005) only provides the number of months per year with sea ice. We therefore do  
65 not attempt to use seasonal measures of sea ice for the model evaluations. The de Vernal et al. (2005) data set uses a  
66 sea-ice concentration threshold of 0.50 to distinguish ice-free from ice-covered states under present conditions,  
67 while the Gersonde et al. (2005) data set uses a concentration of 0.40 to translate concentration to months of  
68 coverage. Gersonde et al, (2005) note that the ice limit is well matched by a concentration value between 0.40 and  
69 0.50, suggesting that any bias between the different thresholds used in these two studies will be minimal. We used a  
70 value of 0.40 to encode model simulations of sea-ice concentrations into months of sea-ice coverage (SInmon),  
71 which is consistent with the common definition (or approach) for translating concentration to months of coverage  
72 (Fowler et al 2004; Maslanik et al. 2011). Thus, the gridded sea ice data are expressed as the number of months with

73 sea ice cover >40% (Sinmon); the change in the number of months at the LGM has been calculated based on a long-  
74 term average (1971-2000) of modern observations of sea-ice cover from the HADISST data set (Rayner et al. 2003).

75  
76

### 77 **1.3. Surface ocean reconstructions: the GHOST data set**

78 The GHOST (Global Holocene Spatial and Temporal Climate Variability) project has produced reconstructions of  
79 mean annual SST for the MH based on surface-dwelling planktonic foraminiferal Mg/Ca and alkenone  
80 measurements (Kim et al. 2004; Leduc et al. 2010). Alkenone and Mg/Ca reconstructions are derived from  
81 empirical calibrations derived under controlled environmental conditions. Although several different calibrations are  
82 used for both the alkenone and Mg/Ca estimates, following the original authors, the uncertainty resulting from this is  
83 small. The measurement error on individual reconstructions is generally estimated as about 1° C. To ensure  
84 compatibility with the MARGO dataset, we recalculated the uncertainties for the GHOST dataset, using the  
85 MARGO approach described above. The reconstructions are given for individual sites, and estimates of the  
86 uncertainties are also given. The MH time-slice reconstruction is based on averaged values of samples falling in  
87 the 1000-year window around 6000 yr B.P. Anomalies are calculated relative to the average SST over the last 1000  
88 years. Gridded values on the 5° by 5° resolution ocean grid were obtained by simple averaging and grid-cell  
89 uncertainty is a pooled estimate of the standard error.

90

### 91 **1.4. Climate reconstructions from ice cores: Braconnot et al. (2012)**

92 Temperature changes at the LGM (defined as the interval between 20.5 to 21.5 ka, and expressed as anomalies with  
93 respect to the mean values of the last millennium) have been obtained from isotopic records, corrected for changes  
94 in sea-water isotopic composition, from five ice cores in East Antarctica (Vostok, EDC, EDML, TALDICE and  
95 Dome F). The estimates take into account the difference in ice-sheet elevation between the LGM and present. The  
96 temperature estimates are based on the use of the present-day isotope-temperature gradient (0.8 ‰ per °C for  $\delta^{18}\text{O}$ ),  
97 and as a result of the  $\pm 0.1$  ‰ change in slope at the LGM results in an uncertainty on the LGM estimates of  $\pm 2^\circ\text{C}$ .  
98 Corrections for colder LGM moisture sources (indicated by deuterium excess data) are only available for the EDC  
99 and EDML ice cores, but could reduce the magnitude of the reconstructed cooling at other sites by approximately  
100 1°C (Stenni et al. 2010). The most likely range of LGM Antarctic fixed-elevation temperature change, taking into  
101 account the differences between the estimates on individual cores (1.4°C), the use of the modern isotope-  
102 temperature slope (2°C), the change in elevation (1°C) and moisture source effects (1°C), is  $-6^\circ\text{C}$  to  $-10^\circ\text{C}$  (57). In  
103 this compilation, we use the original reconstructed anomaly for each site with an error bar of  $\pm 2^\circ\text{C}$  (Table S1).

104

### 105 **1.5. Other quantitative climate reconstructions: Schmittner et al. (2011)**

106 Schmittner et al. (2011) compiled quantitative estimates from the literature of surface temperature anomalies for the  
107 LGM. Many of these sites are included in the data sets described above. However, there are five terrestrial sites and  
108 25 marine sites included in Schmittner et al. (2011) that are not available from other sources (Table S2). These data  
109 have been included in our data sets for completeness.

110

## 1.6. Climate reconstructions from speleothems

Calcium carbonate precipitates – speleothems – in limestone caves can provide precisely dated archives containing information about long-term climate variability (Fairchild et al. 2006; Fairchild and Treble 2009; Lachniet 2009). Significant contributions have been made by studies of stable isotope composition, trace elements, luminescent laminae and calcite fabrics of speleothems (mainly stalagmites). Interpretation requires information about site-specific conditions. Monitoring of present-day speleothem-forming processes is an important tool (Tremaine et al. 2011). Most commonly  $\delta^{18}\text{O}$  in speleothems is interpreted as reflecting  $\delta^{18}\text{O}$  composition of meteoric water, which in turn reflects surface temperatures (especially at high latitudes) and/or amount effects (especially in tropical oceanic sites and monsoon regions). However, other processes also influence the  $\delta^{18}\text{O}$  composition in precipitation, such as changes in atmospheric circulation patterns or in climate modes which may lead to changing temperature/ $\delta^{18}\text{O}$  relationship (Dayem et al. 2010; Pausata et al. 2011). Although the stable carbon isotope composition of speleothems has been regarded as more ambiguous than that of oxygen isotopes, an increasing number of studies demonstrate the potential of stable carbon-isotope variations to provide additional information on climate and environment (Dreybrodt and Scholz 2011). Measured variations can be a function of the amount of  $\text{C}_3$  versus  $\text{C}_4$  vegetation, vegetation cover, soil biological activity, bedrock proportion, rainfall amount and drip rate. Speleothem records are dated using uranium-thorium dating (U-Th dating) methods, which provide ages in calendar years and normally with small uncertainties (Dorale et al. 2004). Larger uncertainties are introduced if the sample is contaminated by detrital  $^{230}\text{Th}$ . A correction factor then has to be applied (Hellstrom 2006).

We reviewed published speleothem records covering one or both of the MH and LGM time periods. We evaluated the reliability of each record, using the following criteria:

a) The record has a reliable age model, i.e. it is based on U-Th dating, using Thermal Ionization Mass Spectrometry (TIMS) or Inductively Coupled Plasma Mass Spectrometry (ICP-MS) techniques, it yields most ages in stratigraphic order and the uncertainty intervals of individual dates are less than the age intervals between dates. Records with large uncertainty intervals are included if a change in the age model within the uncertainty interval does not affect the climate interpretation.

b) The record has bracketing dates within 1000 yr of 6000 yr BP and within 2000 yr of 21000 yr BP.

c) The record lacks bracketing dates within 1000 yr of 6000 yr BP or within 2000 yr of 21000 yr BP, but has a climate signal that is consistent throughout the period bracketed within the closest dates.

d) The interpretation of the record in terms of temperature and/or precipitation changes is robust.

e) The record is related to present-day conditions, shown either by (1) continuous speleothem growth until present day; (2) long-term monitoring of present day processes clearly distinguishing the present conditions from the past;

148 (3) a halt in growth until the present indicating wetter conditions during past growth (applied only in one case:  
149 Yudamutana Cave). Records that do not relate to present-day conditions are listed in Table S3 but were not used in  
150 further evaluation.

151  
152 f) The record yields quantitative information. Methods for retrieving quantitative data include the analysis of fluid  
153 inclusions, clumped isotope thermometry and calibration using instrumental record and or other quantitative climate  
154 records.

155  
156 g) The record yields qualitative information. Reliable interpretation of retrieved data in terms of relative changes in  
157 past temperature and/or precipitation relies on the understanding of the relationship between the data measured  
158 ( $\delta^{18}\text{O}$ ,  $\text{d}^{13}\text{C}$ , trace elements etc.) and atmospheric processes, and requires a present-day benchmark to indicate the  
159 response to known conditions.

160  
161 Speleothem records from a total number of 65 caves met the above criteria. Of these 28 did not relate to the present-  
162 day conditions and were not used in further analyses (Table S3). Of the remaining 37 records (Table S4; Figure S1),  
163 most yield information on relative precipitation changes while fewer records provide information on relative  
164 temperature changes. Quantitative estimates are available from only 6 caves.

165

## 166 **1.7. Combined climate reconstructions data set**

167 The combined data sets provide 10 climate benchmarks: MAT, MTCO, MTWA, GDD5, MAP,  $\alpha$  over land and  
168 SSTsum, SSTwin, SSTann, SInmon for the oceans. We have combined the data from all sources to produce new  
169 estimates on a  $2^\circ$  by  $2^\circ$  resolution land or ocean grid, again using simple averaging to derive a grid-cell value and  
170 the pooled estimate of the standard error to derive the uncertainty. The addition of a comparatively small number of  
171 extra data points to the existing gridded data sets does not change the patterns or magnitudes of the reconstructions,  
172 but ensures that the current data set is as comprehensive as possible. The final gridded data sets for each benchmark  
173 for each period are shown in Figures S2 through S5.

174

175

## 176 **2. Climate modelling protocol**

177 The MH and LGM simulations are equilibrium experiments, presenting a “snapshot” of climate at a specific time.  
178 Table S5 shows the boundary conditions used for MH and LGM experiments in the second phase of the  
179 Palaeoclimate Modelling Intercomparison Project (PMIP2) compared to the boundary conditions used for these  
180 experiments in the Coupled Modelling Intercomparison Project (CMIP5). The ultimate external forcing of climate is  
181 change in incoming solar radiation (insolation) as determined by changes in the Earth’s orbit. Changes in insolation  
182 can be specified precisely. Due to the slow variations of Earth’s orbital parameters, the seasonal and latitudinal  
183 distribution of MH insolation was different from present, enhancing the magnitude of the seasonal contrast in the  
184 Northern Hemisphere by about  $60 \text{ Wm}^{-2}$ . Insolation forcing at the LGM was very similar to present. Atmospheric

185 composition (long-lived greenhouse gas concentrations) during the MH and at the LGM are prescribed to conform  
186 to ice-core measurements. Changes in ice sheet extent can be specified from geomorphic evidence, but there are  
187 several possible configurations of LGM ice-sheet orography that are consistent with relative sea-level and geoidal  
188 constraints. In the PMIP2 experiments, the LGM ice sheets were specified from Peltier (2004). The CMIP5 ice  
189 sheets are a blended product made from three recent ice-sheet reconstructions (Braconnot et al. 2012). Although  
190 there were some small ice-sheet relicts in eastern Canada at 6 ka, they have been ignored in both the PMIP2 and  
191 CMIP5 experiments. Some of the models in PMIP2 simulated vegetation dynamics explicitly (i.e. were fully  
192 coupled ocean-atmosphere-vegetation general circulation models, OAVs) but vegetation cover and albedo had to be  
193 specified for the coupled ocean-atmosphere general circulation models (OAs). Processes associated with the  
194 terrestrial and marine carbon cycle were ignored in the PMIP2 experiments, but are included as interactive  
195 components of some of the models (here designated as OACs) used in CMIP5.

196

### 197 **3. Processing climate model output**

198 We use outputs from all of the models archived at either PMIP2 or CMIP5 on August 15<sup>th</sup> 2012 (Table S6). One  
199 model (CSIRO3.1.2) has performed the CMIP5 MH experiment, but is not an official CMIP5 simulation because the  
200 mandatory future experiments have not been made with this model version. Nevertheless, for simplicity, we refer to  
201 this simulation as a CMIP5 paleo-experiment. Climate simulations of the MH are available for 13 OAs and 6 OAVs  
202 from the PMIP2 archive and 10 OA simulations and 5 coupled carbon-cycle (OAC) simulations from the CMIP5  
203 archive. Climate simulations of the LGM are available for 7 OA simulations and 2 OAV simulation from the PMIP2  
204 archive, and 3 OA and 3 OAC simulations from the CMIP5 archive. No MH SSTann data were archived by August  
205 15<sup>th</sup> 2012 for four models: ECHAM, EARTH, FGOALSG2, and FGOALS2. For these models, comparisons were  
206 therefore restricted to land variables. There were no LGM sea-ice data archived for the PMIP2 IPSL4 model, and no  
207 SST or sea-ice data for the COSMOS model by August 15<sup>th</sup> 2012. For these two models, comparisons were  
208 restricted to the subset of variables available.

209

210 We analyzed five climate variables from these archives: near-surface air temperature (*tas*), precipitation flux (*pr*),  
211 cloud-area fraction (*clt*), sea-surface temperature (*tos*), and sea-ice fraction (*sic*). The first three variables were used  
212 to create bioclimatic variables, while the last two were used to characterize SSTs and sea ice. The general strategy  
213 involves the calculation of long-term means from the archived time-series data, interpolation of the means on to a  
214 0.5° grid, the calculation of variables directly comparable to paleoclimatic reconstructions, and the aggregation of  
215 those data to coarser-resolution grids. For the variables used to calculate bioclimatic variables, calculation on the  
216 0.5° grid is important for propagating the observed spatial variability of climate (sensed by the paleodata) into the  
217 coarser-resolution simulations, while for SST and (which are sometimes calculated on rotated-pole or other non-  
218 latitude-by-longitude grids), interpolation on to a common grid facilitates the creation of ensembles, and aggregation  
219 to resolutions appropriate for comparisons with the paleo-reconstructions. The first analysis steps were identical for  
220 each variable, while subsequent steps treated near-surface temperature, precipitation and clouds as a group, and  
221 SSTs and sea ice as a group.

222

223 *Step 1 (all variables): Calculation of long-term means and standard deviations on the native grids of the models.*

224 Where monthly time series data were available (most PMIP2 models and all CMIP5 models), we calculated long-

225 term means and standard deviations from the last 100 years of the available simulations (taking care to synchronize

226 the observations across variables, so that the means were based on identical time spans). In the case of data sets

227 shorter than 100 years (PMIP2 CCSM and GISSmodelE, CMIP5 CCSM 4), the long-term means were based on the

228 whole length of the time series archived. Only pre-computed long-term means (“SE” files in the PMIP2 data base)

229 were available for some PMIP2 simulations (ECBILT.LV, ECHAM (OAV), HadCM3), and those were adopted

230 without modification. Near-surface air temperature and SST were transformed to degrees Celsius ( $^{\circ}\text{C}$ ), and

231 precipitation flux (in  $\text{kg m}^2 \text{sec}^{-1}$ ) was converted to total monthly precipitation ( $\text{mm month}^{-1}$ ), taking into account the

232 variable number of days per month according to the specific calendar employed by each model (e.g. 360-day vs.

233 365-day), and the changes over time related to orbital variations.

234 *Step 2 (all variables): Interpolation to a  $0.5^{\circ}$  grid.* The long-term means and standard deviations on the model

235 grids were interpolated to a  $0.5^{\circ}$  grid that followed the Climate Research Unit (CRU) CL 2.0 data set used here to

236 provide “modern” high-resolution data. We used bilinear interpolation for temperature, precipitation and clouds, as

237 implemented in the CDO package (<https://code.zmaw.de/projects/cdo>) (remapbil). For ocean grids that were based

238 on rotated-pole or non-latitude-longitude grids, bilinear interpolation resulted in expansion of continental areas

239 (consequently masking the near-shore location of many of the marine paleodata points), and so we adopted nearest-

240 neighbor interpolation (remapnn) for SSTs and sea ice.

241 *Step 3 (temperature, precipitation, clouds): Calculation of anomalies.* Anomalies or long-term mean differences

242 (experiment minus control) of temperature, precipitation and clouds were calculated in the standard way.

243 *Step 4 (temperature, precipitation, clouds): Application of anomalies to modern CRU data.* The anomalies

244 calculated in Step 3 were applied to the CRU CL 2.0 1961-1990 long-term means to create “paleo” values that retain

245 the spatial variation in the modern. Such variation is important for the proper calculation of bioclimatic variables

246 and for the simulation of vegetation (Harrison et al. 1998). The CRU CL 2.0 data were first extrapolated on to the

247 continental shelves, using the union of  $0.5^{\circ}$  grid points that are above sea level at present or would have been at 6 ka

248 or at 21 ka, as implied by the ICE-5G paleotopography data set (Peltier 2004). Topography and bathymetry were

249 derived from the ETOPO-1 data set. Generic lapse rates for each variable were used to adjust the extrapolated

250 values to reflect elevational trends in the data.

251 *Step 5: (temperature, precipitation, clouds): Calculation of bioclimatic variables.* Bioclimatic variables were

252 calculated using the anomalies from Step 4 on the  $0.5^{\circ}$  grid using the approach of Prentice et al. (1992). The original

253 routines of Cramer and Prentice (1988) and Prentice et al. (1993) were modified to include snow-moisture

254 accounting (where snowmelt is parameterized after Tarboton and Luce 1996) and adapted to use the IGBP-DIS

255 multi-layer soil-properties data set (Global Soil Data Task 2000). The specific variables calculated were GDD5,

256 MTWA, MTCO, MAT, MAP and  $\alpha$ . The calculation of equilibrium evapotranspiration requires data on the percent

257 of possible sunshine. These data were estimated from the cloudiness data using the Doorenbos and Pruitt (1984)

258 approach. A separate regression equation was fit for each month of the year and for each  $0.5^{\circ}$  grid cell using the

259 cloudiness data in CRU CL 1.0 and the percent possible sun data in CLU CL 2.0 in a moving window centered on  
260 each grid point.

261 *Step 6: (bioclimatic variables): Calculation of bioclimatic variable anomalies.* The values of bioclimatic variables  
262 calculated in Step 5 were subtracted from the model-based values calculated in Step 4 to create a set of anomalies.

263 *Step 7: (temperature, precipitation): Gridding of temperature and precipitation.* The anomalies of tas and pr were  
264 re-gridded to a 2° latitude x longitude grid by simple averaging of the 0.5° data within each 2° cell.

265 *Step 8: (bioclimatic variables): Gridding of bioclimatic variable anomalies.* In order to facilitate comparisons with  
266 the terrestrial reconstructions, the anomalies of the bioclimatic variables calculated in the previous step were re-  
267 gridded to a 2° latitude x longitude grid by simple averaging of the 0.5° data within each 2° cell.

268 *Step 9: (sea-surface temperature and sea-ice concentration): Calculation of sea-surface variables.* The monthly  
269 values of SST and sea-ice concentration were used to calculate SSTann, SSTwin, and SSTsum, and SINmon (all  
270 defined in the same way as the seasonal reconstructions, see S1.2).

271 *Step 10: (sea-surface summary variables): Calculation of sea-surface variable anomalies.* Experiment minus  
272 control anomalies of the sea-surface summary variables were calculated in the usual way.

273 *Step 11: (sea-surface summary variables): Re-gridding of the sea-surface variables.* To facilitate comparisons  
274 with the ocean reconstructions, the anomalies calculated in Step 9 were re-gridded to a 2° latitude x 2° longitude  
275 grid by simple averaging of the 0.5° data within each 2° cell. (Note: the data were also re-gridded to 5° by 5° cells,  
276 but although available these data are not used in the current analyses.)

277

## 278 **4. Metrics for comparison of reconstructed and simulated climate variables**

279

### 280 **4.1 Means, medians and interquartile ranges**

281 Mean, median and the interquartile range (IQR) of each variable were calculated separately (a) for all the  
282 appropriate (land/ocean) 2° x 2° grid cells in each set of model results, (b) for just those grid cells corresponding for  
283 which there are observations. Calculation (b) was used as the basis for comparisons of models and data. The  
284 (signed) difference between the median values of a variable based on model results and observations is the ‘median  
285 bias’. A perfect model would be expected to show a bias close to zero, within the limits of precision of the data, so  
286 models can be ranked for a given variable based on the absolute magnitude of their median bias. The *ratio* between  
287 the IQR’s in the model results and observations provides a robust measure of the tendency of the model to under- or  
288 overestimate the degree of spatial variability in the observations. A perfect model in this respect would be expected  
289 to show an IQR ratio close to unity. Models can be ranked based on the absolute magnitude of the logarithm of their  
290 IQR ratio.

291

### 292 **4.2 Kendall’s Tau**

293 Kendall’s rank correlation coefficient tau ( $\tau$ ) was used as the basis for a dissimilarity metric expressing the extent of  
294 agreement in the rank order of anomalies among grid cells (here 2° x 2° cells). This measure does not assess bias in  
295 the modeled values (measured by the median bias) nor disagreement in their variability among grid cells (measured



296 by the ratio of interquartile ranges); it measures the similarity or difference of their spatial patterns without regard  
297 for magnitudes.  $\tau$  is computed by considering all possible pairs of grid cells and asking whether they are concordant  
298 (i.e. one member of the pair is greater than the other in the modeled and observed sets of values) or discordant. It is  
299 defined (in the absence of ties) by:

300

$$301 \quad \tau = (n_c - n_d) / [n(n - 1) / 2]$$

302

303 where the number of concordant pairs is  $n_c$ , the number of discordant pairs is  $n_d$ , and the denominator is the total  
304 number of pairs. A standard procedure exists for the handling of tied values.  $\tau$  takes the value 1 for perfect  
305 agreement and  $-1$  for perfect disagreement in the rankings. A  $\tau$  of zero would mean no rank correlation. As a  
306 dissimilarity metric we therefore defined one minus tau, which takes the value zero for perfect agreement, one for  
307 'no correlation', and values greater than one for anti-correlation. Here we consider values of  $<0.5$  to indicate good  
308 agreement, values between 0.5 and 0.8 to indicate moderate agreement, values between 0.8 and 0.95 to indicate poor  
309 agreement, and values  $>0.95$  to indicate no agreement.

310

### 311 **4.3 Fuzzy distance**

312 One challenge in comparing between data and models is how to include measures of uncertainty in either source of  
313 information. Guiot et al. (1999) proposed a distance measure based on fuzzy logic that explicitly allows for  
314 uncertainties in calculating similarity. The method requires that the variable under investigation is defined as a  
315 triangular fuzzy number for both model and data. Triangular fuzzy numbers are defined as  $A(a_1, a_2, a_3)$ , where  $a_1$   
316 defines the lower limit of the number,  $a_2$  the point of maximum membership and  $a_3$  the upper limit. We use this to  
317 compare each variable at each grid-cell for which we have both model and observed values.

318

319 Fuzzy limits for the data were defined using the reconstruction uncertainties. For each set of observed variables, we  
320 generated a probability density function of potential reconstruction values at each site, using a conditional Gaussian  
321 simulation. This uses the semi-variogram associated with each dataset to constrain the possible values obtained  
322 during any single iteration, reflecting the observed spatial dependency. Fuzzy number limits were then defined as  
323 the 2.5<sup>th</sup> and 97.5<sup>th</sup> percentile of this PDF. As no uncertainty range was available for the models (see above), the  
324 model value is defined using a crisp number, where  $a_1 = a_2 = a_3$ . We use a newer fuzzy distance measure, proposed by  
325 Tran and Duckstein (2002), which is more robust to large differences in the magnitude of the two fuzzy numbers ( $A$ ,  
326  $B$ ) to be compared:

327

$$\begin{aligned}
D^2(A, B) &= (a_2 - b_2)^2 + \frac{1}{3}(a_2 - b_2)[(a_3 + a_1) - (b_3 + b_1)] \\
&+ \frac{1}{18}[(a_3 - a_2)^2 + (a_2 - a_1)^2 + (b_3 - b_2)^2 + (b_2 - b_1)^2] \\
&- \frac{1}{18}[(a_2 - a_1)(a_3 - a_2) + (b_2 - b_1)(b_3 - b_2)] \\
&+ \frac{1}{12}(2a_2 - a_1 - a_3)(2b_2 - b_1 - b_3)
\end{aligned}$$

328

329

330 Once the distance measure  $D^2$  has been calculated for all grid cells, we calculate the median, and use this as the  
331 metric for comparison. This distance metric synthesizes both the spatial pattern and magnitude of difference, and  
332 makes for a useful supplement to the measures of bias. For example, two models may each have a median bias of  
333 close to zero, but only the first has a spatial pattern similar to that of the data. In this case, the median distance for  
334 the second model would be larger than the first. We have chosen to calculate the fuzzy distance assuming that the  
335 relevant uncertainties are those associated with the reconstructions. In the absence of ensemble runs for each model  
336 (which would at least address the uncertainty due to internal variability) or perturbed-physics ensembles for a given  
337 model (which would address structural uncertainty), we cannot estimate individual-model uncertainty. We are  
338 therefore forced to assume that model uncertainty is represented by the differences among models.

339

## 340 **5. Summaries of Metrics**

341 Tables S7 and S8 summarize the numeric values of global benchmark metrics for the LGM and MH respectively for  
342 different model ensembles and Tables S9 and S10 summarize the global benchmark metrics for the LGM and MH  
343 respectively for individual models. These tables are the basis for the construction of Figure 7 and Figure 8 in the  
344 main text. We present ensemble results for all of the models (ALL), all of the PMIP2 models (PMIP2), all of the  
345 CMIP5 models (CMIP5), all of the PMIP2 ocean-atmosphere models (PMIP2 OA), all of the PMIP2 ocean-  
346 atmosphere-vegetation models (PMIP2 OAV), all of the CMIP5 ocean-atmosphere models (CMIP5 OA) and all of  
347 the CMIP5 ocean-atmosphere-carbon cycle models (CMIP5 OAC).

348

349 Figures S6 and S7 show comparisons of simulated and reconstructed zonal mean annual sea-surface temperature  
350 (SSTann) at the LGM and MH respectively.

351

## 352 **Supplementary References**

353

354 Affek HP, Bar-Matthews M, Ayalon A, Matthews A, Eiler J.M. (2008) Glacial/interglacial temperature variations in  
355 Soreq cave speleothems as recorded by “clumped isotope” thermometry. *Geochim Cosmochim Acta*  
356 72:5351-5360

357 Arz HW, Pätzold J, Müller PJ, Moammar MO (2003) Influence of Northern Hemisphere climate and global sea  
358 level rise on the restricted Red Sea marine environment during termination I. *Paleoceanography* 18:053  
359 doi:10.1029/2002PA000864

360 Asmeron Y, Polyak VJ, Burns SJ, Rasmussen J (2007) Solar forcing of Holocene climate: New insights from a  
361 speleothem record, southwestern United States. *Geology* 35:1-4

362 Asmeron Y, Polyak VJ, Burns SJ (2010) Variable winter moisture in the southwestern United States linked to rapid  
363 glacial climate shifts. *Nature Geoscience* 3:114-117.

364 Barker S, Diz P, Vautravers MJ, Pike J, Knorr G, Hall IR, Broecker WS (2009) Interhemispheric Atlantic seesaw  
365 response during the last deglaciation. *Nature* 457:1097-1050

366 Bar-Matthews M, Ayalon A, Kaufman A, Wasserburg GJ (1999) The Eastern Mediterranean paleoclimate as a  
367 reflection of regional events: Soreq cave, Israel. *Earth Planet Sci Lett* 166:85-95

368 Bar-Matthews M, Ayalon A, Gilmour M, Matthews A, Hawkesworth CJ (2003) Sea-land oxygen isotopic  
369 relationships from planktonic foraminifera and speleothems in the Eastern Mediterranean region and their  
370 implication for paleorainfall during interglacial intervals. *Geochim Cosmochim Acta* 67:3181-3199

371 Bar-Matthews M, Ayalon A (2010) Mid-Holocene climate variations revealed by high-resolution speleothem  
372 records from Soreq Cave, Israel and their correlation with cultural changes. *Holocene* 21:163-171

373 Barrows TT, Lehman SJ, Fifield LK, De Deckker P (2007) Absence of cooling in New Zealand and the adjacent  
374 ocean during the younger dryas chronozone. *Science* 318:86-89

375 Bartlein PJ, Webb III T, Fleri EC (1984) Holocene climatic change in the northern Midwest: Pollen-derived  
376 estimates. *Quat Res* 22:361-374

377 Bartlein PJ, Prentice IC, Webb III T (1986) Climatic response surfaces from pollen data for some eastern North  
378 American taxa. *J Biogeog* 13:35-57

379 Bartlein PJ, Harrison SP, Brewer S, Connor S, Davis BAS, Gajewski K, Guiot J, Harrison-Prentice TI, Henderson  
380 A, Peyron O, Prentice IC, Scholze M, Seppä H, Shuman B, Sugita S, Thompson RS, Viau AE, Williams J,  
381 Wu H (2011) Pollen-based continental climate reconstructions at 6 and 21 ka: a global synthesis. *Clim Dyn*  
382 37:775-802

383 Benway HM, Mix AC, Haley BA, Klinkhammer GP (2006) Eastern Pacific Warm Pool paleosalinity and climate  
384 variability: 0-30 kyr. *Paleoceanography* doi:10.1029/2005PA001208

385 Bernal JP, Lachniet M, McCulloch M, Mortimer G, Morales P, Cienfuegos E (2011) A speleothem record of  
386 Holocene climate variability from southwestern Mexico. *Quat Res* 75:104-113

387 Braconnot P, Harrison SP, Kageyama M, Bartlein PJ, Masson-Delmotte V, Abe-Ouchi A, Otto-Bliesner B, Zhao Y  
388 (2012) Evaluation of climate models using palaeoclimatic data. *Nature Climate Change*. doi:  
389 10.1038/NCLIMATE1456

390 Budich R, Giorgetta M, Jungclaus J, Redler R, Reick C (2010) The MPI-M Millennium Earth System Model: An  
391 Assembling Guide for the COSMOS Configuration. Available online.  
392 [http://cosmos.enes.org/fileadmin/user\\_upload/cosmos/documents/Documentation/M-ESM-Assembling-](http://cosmos.enes.org/fileadmin/user_upload/cosmos/documents/Documentation/M-ESM-Assembling-Guide.pdf)  
393 [Guide.pdf](http://cosmos.enes.org/fileadmin/user_upload/cosmos/documents/Documentation/M-ESM-Assembling-Guide.pdf)

394 Cai Y, Tan L, Cheng H, An Z, Edwards RL, Kelly MJ, Kong X, Wang X (2010) The variation of summer monsoon  
395 precipitation in central China since the last deglaciation. *Earth Planet Sci Lett* 291:21-31

396 Calvo E, Pelejero C, De Deckker P, Logan GA (2007) Antarctic deglacial pattern in a 30 kyr record of sea surface  
397 temperature offshore South Australia. *Geophys Res Lett*. doi: 10.1029/2007GL029937

398 Carlson AE, Oppo DW, Came RE, LeGrande AN, Keigwin LD, Curry WB (2008) Subtropical Atlantic salinity  
399 variability and Atlantic meridional circulation during the last deglaciation. *Geology* 36:991-994

400 Castañeda IS, Schefuß E, Pätzold J, Sinninghe Damsté JS, Weldeab S, Schouten S (2010) Millennial-scale sea  
401 surface temperature changes in the eastern Mediterranean (Nile River Delta region) over the last 27,000  
402 years. *Paleoceanography* doi: 10.1029/2009PA001740

403 Cheng H, Zhang PZ, Spötl C, Edwards RL, Cai YJ, Zhang DZ, Sang WC, Tan W, An ZS (2012) The climatic  
404 cyclicity in semiarid-arid central Asia over the past 500,000 years. *Geophys Res Lett* 39:L01705.  
405 doi:10.1029/2011GL050202

406 Collins WJ, Bellouin N, Doutriaux-Boucher M, Gedney N, Halloran P, Hinton T, Hughes J, Jones CD, Joshi M,  
407 Liddicoat S, Martin G, O'Connor F, Rae J, Senior C, Sitch S, Totterdell I, Wiltshire A, Woodward S (2011)  
408 Development and evaluation of an Earth-system model HadGEM2. *Geosci Model Dev* 4:1051-1075

409 Constantin S, Bojar A-V, Lauritzen S-E, Lundberg J (2007) Holocene and Late Pleistocene climate in the sub-  
410 Mediterranean continental environment: A speleothem record from Poleva Cave (Southern Carpathians,  
411 Romania). *Palaeogeogr, Palaeoclimatol, Palaeoecol* 243:322-338

412 Cosford J, Qing H, Yuan D, Zhang M, Holmden C, Patterson W, Hai C (2008a) Millennial-scale variability in the  
413 Asian monsoon: Evidence from oxygen isotope records from stalagmites in southeastern China.  
414 *Palaeogeogr, Palaeoclimatol, Palaeoecol* 266:3-12

415 Cosford J, Qing H, Eglington B, Matthey D, Yuan D, Zhang M, Cheng H (2008b) East Asian monsoon variability  
416 since the Mid-Holocene recorded in a high-resolution, absolute-dated aragonite speleothem from eastern  
417 China. *Earth Planet Sci Lett* 275:296-307

418 Cosford J, Qing H, Matthey D, Eglington B, Zhang M (2009) Climatic and local effects on stalagmite  $\delta^{13}\text{C}$  values at  
419 Lianhua Cave, China. *Palaeogeogr, Palaeoclimatol, Palaeoecol* 280:235-244

420 Cosford J, Qing H, Eglington B, Matthey D, Chen YG, Zhang M, Cheng H (2010) The East Asian monsoon during  
421 MIS 2 expressed in a speleothem  $\delta^{18}\text{O}$  record from Jintanwan Cave, Huan, China. *Quat Res* 73:541-549

422 Cramer W, Prentice IC (1988) Simulation of regional soil moisture deficits on a European scale. *Norsk Geograf Tids*  
423 *42:149-151*

424 Cruz FW, Burns SJ, Karmann I, Sharp WD, Vuille M, Cardoso AO, Ferrari JA, Dias PL, Viana O (2005) Insolation-  
425 driven changes in atmospheric circulation over the past 116,000 years in subtropical Brazil. *Nature* 434:63-  
426 66

427 Cruz FW, Burns SJ, Jercinovic M, Karmann I, Sharp WD, Vuille M (2007) Evidence of rainfall variations in  
428 Southern Brazil from trace element ratios (Mg/Ca and Sr/Ca) in a Late Pleistocene stalagmite. *Geochim*  
429 *Cosmochim Acta* 71:2250-2263

430 Dayem KE, Molnar P, Battisti DS, Roe GH (2010) Lessons learned from oxygen isotopes in modern precipitation  
431 applied to interpretation of speleothem records of paleoclimate from eastern Asia. *Earth Planet Sci Lett*  
432 295:219-230

433 deMenocal P, Ortiz J, Guilderson T, Sarnthein M (2000) Coherent high- and low-latitude climate variability during  
434 the Holocene warm period. *Science* 288:2198-2202

435 Denniston RF, González, Asmerom Y, Baker RG, Reagan MK, Bettis III EA (1999) Evidence for increased cool  
436 season moisture during the middle Holocene. *Geology* 27:815-818

437 de Vernal A, Eynaud F, Henry M, Hillaire-Marcel C, Londeix L, Mangin S, Matthiessen J, Marret F, Radi T,  
438 Rochon A, Solignac S, Turon J-L (2005) Reconstruction of sea-surface conditions at middle to high  
439 latitudes of the Northern Hemisphere during the Last Glacial Maximum (LGM) based on dinoflagellate  
440 cyst assemblages. *Quat Sci Rev* 24:897-924

441 de Vries P, Weber SL (2005) The Atlantic freshwater budget as a diagnostic for the existence of a stable shut down  
442 of the meridional overturning circulation *Geophys Res Lett* 32:L09606. doi: 10.1029/2004GL021450

443 Dong J, Wang Y, Cheng H, Hardt B, Edwards RL, Kong X, Wu J, Chen S, Liu D, Jiang X, Zhao K (2010) A high-  
444 resolution stalagmite record of the Holocene East Asian monsoon from Mt Shennongjia, central China.  
445 *Holocene* 20:257-264

446 Doorenbos J, Pruitt WO (1984) Crop water requirements. FAO Irrigation and Drainage Paper No. 24, Food and  
447 Agriculture Organization of the United Nations, Rome, pp 144

448 Dorale JA, Edwards RL, Alexander CA, Shen C-C, Richards DA, Cheng H (2004) Uranium-series dating of  
449 speleothems: current techniques, limits and applications. In: *Studies of Cave Sediments. Physical and*  
450 *Chemical Records of Palaeoclimate* (eds Sasowsky ID, Mylroie J) Kluwer Academic, New York, pp 177-  
451 197

452 Dreybrodt W, Scholz D (2011) Climatic dependence of stable carbon and oxygen isotope signals recorded in  
453 speleothems: From soil water to speleothem calcite. *Geochim Cosmochim Acta* 75:734-752

454 Drysdale R, Zanchetta G, Hellstrom J, Maas R, Fallick A, Pickett M, Cartwright I, Piccini L (2006) Late Holocene  
455 drought responsible for the collapse of Old World civilizations is recorded in an Italian cave flowstone.  
456 *Geology* 34:101-104

457 Dykoski CA, Edwards RL, Cheng H, Yuan D, Cai Y, Zhang M, Lin Y, Qing J, An Z, Revenaugh J (2005) A high-  
458 resolution, absolute-dated Holocene and deglacial Asian monsoon record from Dongge Cave, China. *Earth*  
459 *Planet Sci Lett* 233:71-86

460 Essery RLH, Best MJ, Betts RA, Cox PM, Taylor CM (2003) Explicit representation of subgrid heterogeneity in a  
461 GCM land surface scheme. *J Hydrometeor* 4:530-543

462 Fairchild IJ, Smith CL, Baker A, Fuller L, Spötl C, Matthey D, McDermott F, EIMF (2006) Modification and  
463 preservation of environmental signals in speleothems. *Earth Sci Rev* 75:105-153

464 Fairchild IJ, Treble PC (2009) Trace elements in speleothems as recorders of environmental change. *Quat Sci Rev*  
465 28:449-468

466 Farmer EC, deMenocal PB, Marchitto TM (2005) Holocene and deglacial ocean temperature variability in the  
467 Benguela upwelling region: Implications for low-latitude atmospheric circulation. *Paleoceanography* 20  
468 Fleitmann D, Burns SJ, Neff U, Mangini A, Matter A (2003) Changing moisture sources over the last 330,000 years  
469 in Northern Oman from fluid-inclusion evidence in speleothems. *Quat Res* 60:223-232  
470 Fleitmann D, Burns SJ, Mangini A, Mudelsee M, Kramers J, Villa I, Neff U, Al-Subbary AA, Buettner A, Hippler  
471 D, Matter A (2007) Holocene ITCZ and Indian monsoon dynamics recorded in stalagmites from Oman and  
472 Yemen (Socotra). *Quat Sci Rev* 26:170-188  
473 Fleitmann D, Cheng H, Badertscher S, Edwards RL, Mudelsee M, Göktürk OM, Fankhauser A, Pickering R, Raible  
474 CC, Matter A, Kramers J, Tüysüz O (2009a) Timing and climatic impact of Greenland interstadials  
475 recorded in stalagmites from northern Turkey. *Geophys Res Lett* 36:L19797  
476 Fleitmann D, Matter A (2009b) The speleothem record of climate variability in Southern Arabia. *Geoscience*  
477 341:633-642  
478 Flower BP, Hastings DW, Hill HW, Quinn TM (2004) Phasing of deglacial warming and Laurentide ice sheet  
479 meltwater in the Gulf of Mexico. *Geology* 32:597-600  
480 Fowler C, Emery WJ, Maslanik J (2004) Satellite-derived evolution of Arctic sea ice age: October 1978 to March  
481 2003. *IEEE Geosci Remote Sens Letters* 1:71-74  
482 Frisia S, Borsato A, Spötl C, Villa IM, Cucchi F (2005) Climate variability in the SE Alps of Italy over the past  
483 17 000 years reconstructed from a stalagmite record. *Boreas* 34:445-455  
484 Frumkin A, Ford DC, Schwarcz HP (1999) Continental oxygen isotopic record of the last 170,000 years in  
485 Jerusalem. *Quat Res* 51:317-327  
486 Gent PR, Danabasoglu G, Donner LJ, Holland MM, Hunke EC, Jayne SR, Lawrence DM, Neale RB, Rasch PJ,  
487 Vertenstein M, Worley PH, Yang Z-L, Zhang M (2011) The community climate system model version 4. *J*  
488 *Clim* 24:4973-4991  
489 Genty D, Blamart D, Ghaleb B, Plagnes V, Causse Ch, Bakalowicz M, Zouari K, Chkir N, Hellstrom J, Wainer K,  
490 Bourges F (2006) Timing and dynamics of the last deglaciation from European and North African  $\delta^{13}\text{C}$   
491 stalagmite profiles - comparison with Chinese and South Hemisphere stalagmites. *Quat Sci Rev* 25:2118–  
492 2142  
493 Gersonde R, Crosta X, Abelmann A, Armand L (2005) Sea-surface temperature and sea ice distribution of the  
494 Southern Ocean at the EPILOG Last Glacial Maximum: A circum-Antarctic view based on siliceous  
495 microfossil records. *Quat Sci Rev* 24:869-896  
496 Global Soil Data Task (2000) Global Soil Data Products, CD-ROM. International Geosphere–Biosphere  
497 Programme Data and Information System, Potsdam, Germany. Available from Oak Ridge National  
498 Laboratory Distributed Active Archive Center (<http://www.daac.ornl.gov>)  
499 Göktürk OM, Fleitmann D, Badertscher S, Cheng H, Edwards RL, Leuenberger M, Fankhauser A, Tüysüz O,  
500 Kramers J (2011) Climate on the southern Black Sea coast during the Holocene: implications from the  
501 Sofular Cave record. *Quat Sci Rev* 30:2433-2445

502 Gordon C, Cooper C, Senior CA, Banks H, Gregory JM, Johns TC, Mitchell JFB, Wood RA (2000) The simulation  
503 of SST, sea ice extents and ocean heat transport in a version of the Hadley Centre coupled model without  
504 adjustments. *Clim Dyn* 16:147-168

505 Griffiths ML, Drysdale RN, Gagan MK, Zhao J-X, Ayliffe LK, Hellstrom JC, Hantoro WS, Frisia S, Feng Y-X,  
506 Cartwright I, Pierre ESt, Fischer MJ, Suwargadi BW (2009) Increasing Australian-Indonesian monsoon  
507 rainfall linked to early Holocene sea-level rise. *Nature Geoscience* 2:636-639

508 Griffiths ML, Drysdale RN, Vonhof HB, Gagan MK, Zhao J-X, Ayliffe LK, Hantoro WS, Hellstrom JC, Cartwright  
509 I, Frisia S, Suwargadi BW (2010a) Younger Dryas-Holocene temperature and rainfall history of southern  
510 Indonesia from  $\delta^{18}\text{O}$  in speleothem calcite and fluid inclusions. *Earth Planet Sci Lett* 295:30-36

511 Griffiths ML, Drysdale RN, Gagan MK, Frisia S, Zhao JX, Ayliffe LK, Hantoro WS, Hellstrom JC, Fischer MJ,  
512 Feng YX, Suwargadi BW (2010b) Evidence for Holocene changes in Australian-Indonesian monsoon  
513 rainfall from stalagmite trace element and stable isotope ratios. *Earth Planet Sci Lett* 292:27-38

514 Guiot J, Boreux JJ, Braconnot P, Torre F (1999) Data-model comparisons using fuzzy logic in palaeoclimatology.  
515 *Clim Dyn* 15:569–581

516 Hardt B, Rowe HD, Springer GS, Cheng H, Edwards RL (2010) The seasonality of east central North American  
517 precipitation based on three coeval Holocene speleothems from southern West Virginia. *Earth Planet Sci*  
518 *Lett* 295:342-348

519 Harrison SP, Jolly D, Laarif F, Abe-Ouchi A, Dong B, Herterich K, Hewitt C, Joussaume S, Kutzbach JE, Mitchell  
520 J, de Noblet N, Valdes P (1998) Intercomparison of simulated global vegetation distribution in response to  
521 6 kyr BP orbital forcing. *J Clim* 11:2721-2742

522 Hazeleger W, Wang X, Severijns C, Stefanescu S, Bintanja R, Sterl A, Wyser K, Semmler T, Yang S, van den Hurk  
523 B, van Noije T, van der Linden E, van der Wiel K (2012) EC-Earth V2.2: description and validation of a  
524 new seamless Earth system prediction model. *Clim Dyn* 39:2611-2629, doi:10.1007/s00382-011-1228-5.

525 Hellstrom J, McCulloch M, Stone J (1998) A detailed 31,000-year record of climate and vegetation change, from the  
526 isotope geochemistry of two New Zealand speleothems. *Quat Res* 50:167-178

527 Hellstrom J (2006) U-Th dating of speleothems with high initial  $^{230}\text{Th}$  using stratigraphical constraint. *Quat Geochr*  
528 *1*:289-295

529 Holmgren K, Lee-Thorp JA, Cooper GJ, Lundblad K, Partridge TC, Scott L, Sitaldeen R, Talma AS, Tyson PD  
530 (2003) Persistent millennial-scale climatic variability over the past 25 thousand years in southern Africa.  
531 *Quat Sci Rev* 22:2311-2326

532 Hu C, Henderson GM, Huang J, Xie S, Sun Y, Johnson KR (2008) Quantification of Holocene Asian monsoon  
533 rainfall from spatially separated cave records. *Earth Planet Sci Lett* 266:221-232

534 Huguet C, Kim J-H, Damsté JSS, Schouten S (2006) Reconstruction of sea surface temperature variations in the  
535 Arabian Sea over the last 23 kyr using organic proxies (TEX(86) and U(37)(K')). *Paleoceanography*  
536 *21*:PA3003

537 Huntley B, Prentice IC (1988) July temperatures in Europe from pollen data, 6000 years before present. *Science*  
538 *241*:687-690

539 Ijiri A, Wang L, Oba T, Kawahata H, Huang CH-Y, Huang C-Y (2005) Paleoenvironmental changes in the northern  
540 area of the East China Sea during the past 42,000 years. *Palaeogeogr, Palaeoclimatol, Palaeoecol* 219:239-  
541 261

542 Isono D, Yamamoto M, Irino T, Oba T, Murayama M, Nakamura T, Kawahata H (2009) The 1500-year climate  
543 oscillation in the midlatitude North Pacific during the Holocene. *Geology* 37:591-594

544 Jacob R, Schafer C, Foster I, Tobis M, Anderson J (2001) Computational design and performance of the Fast Ocean  
545 Atmosphere Model: Version 1. *The 2001 International Conference on Computational Science*, pp 175–184

546 Jaeschke A, Rühlemann C, Arz H, Heil G, Lohmann G (2007) Coupling of millennial-scale changes in sea surface  
547 temperature and precipitation off northeastern Brazil with high-latitude climate shifts during the last glacial  
548 period. *Paleoceanography* 22

549 Johns TC, Royer J-F, Höschel I, Heubener H, Roeckner E, Manzini E, May W, Dufresne J-L, Otterå OH, van  
550 Vuuren DP, Salas y Melia D, Giorgetta MA, Denvil S, Yang S, Fogli PG, Körper J, Tjiputra JF, Stehfest E,  
551 Hewitt CD (2011) Climate change under aggressive mitigation: The ENSEMBLES multi-model  
552 experiment. *Clim Dyn* 37:1975-2003

553 Jones CD, Hughes JK, Bellouin N, Hardiman SC, Jones GS, Knight J, Liddicoat S, O'Connor FM, Andres RJ, Bell  
554 C, Boo K-O, Bozzo A, Butchart N, Cadule P, Corbin KD, Doutriaux-Boucher M, Friedlingstein P, Gornall  
555 J, Gray L, Halloran PR, Hurtt G, Ingram WJ, Lamarque J-F, Law RM, Meinshausen M, Osprey S, Palin EJ,  
556 Chini LP, Raddatz T, Sanderson MG, Sellar AA, Schurer A, Valdes P, Wood N, Woodward S, Yoshioka  
557 M, Zerroukat M (2011) The HadGEM2-ES implementation of CMIP5 centennial simulations. *Geosci*  
558 *Model Dev* 4:543-570

559 Jungclaus JH, Keenlyside N, Botzet M, Haak H, Luo J-J, Latif M, Marotzke J, Mikolajewicz U, Roeckner E (2006)  
560 Ocean circulation and tropical variability in the coupled model ECHAM5/MPI-OM. *J Clim* 19:3952–3972

561 K-1-Model-Developers (2004) K-1 Coupled GCM (Miroc Description)1, pp 34

562 Kaiser J, Schefuß E, Lamy F, Mohtadi M, Hebbeln D (2008) Glacial to Holocene changes in sea surface temperature  
563 and coastal vegetation in north central Chile: high versus low latitude forcing. *Quat Sci Rev* 27:2064-2075

564 Kanner LC, Burns SJ, Cheng H, Edwards RL (2012) High-latitude forcing of the South American summer monsoon  
565 during the last glacial. *Science* 335:570-573

566 Kaufman A, Wasserburg GJ, Porcelli D, Bar-Matthews M, Ayalon A, Halicz L (1998) U-Th systematics from the  
567 Soreq cave, Israel and climatic correlations. *Earth Planet Sci Lett* 156:141-155

568 Kim JH, Rimbu N, Lorenz SJ, Lohmann G, Nam S-I, Schouten S, Rühlemann C, Schneider RR (2004) North Pacific  
569 and North Atlantic sea-surface temperature variability during the Holocene. *Quat Sci Rev* 23:2141-2154

570 Kienast M, Kienast SS, Calvert SE, Eglinton TI, Mollenhauser G, François R, Mix AC (2006) Eastern Pacific  
571 cooling and Atlantic overturning circulation during the last deglaciation. *Nature* 443:846-849

572 Koutavas A, Sachs JP (2008) Northern timing of deglaciation in the eastern equatorial Pacific from alkenone  
573 paleothermometry. *Paleoceanography* 23

574 Kucera M, Weinelt M, Kiefer T, Pflaumann U, Hayes A, Weinelt M, Chen M-T, Mix AC, Barrows TT, Cortijo E,  
575 Duprat J, Juggins S, Waelbroeck C (2005) Reconstruction of sea-surface temperatures from assemblages of



576 planktonic foraminifera: multi-technique approach based on geographically constrained calibration datasets  
577 and its application to glacial Atlantic and Pacific Oceans. *Quat Sci Rev* 24:951-998

578 Lachniet MS, Asmerom Y, Burns SJ, Patterson WP, Polyak VJ, Seltzer GO (2004) Tropical response to the 8200 yr  
579 B.P. cold event? Speleothem isotopes indicate a weakened early Holocene monsoon in Costa Rica. *Geology*  
580 32:957-960

581 Lachniet MS (2009) Climatic and environmental controls on speleothem oxygen-isotope values. *Quat Sci Rev*  
582 28:412-432

583 Lamy F, Kaiser J, Arz HW, Hebbeln D, Ninnemann U, Timm O, Timmermann A, Toggweiler JR (2007)  
584 Modulation of the bipolar seesaw in the southeast Pacific during Termination 1. *Earth Planet Sci Lett*  
585 259:400-413

586 Lauritzen SE, Lundberg J (1999) Calibration of the speleothem delta function: an absolute temperature record for  
587 the Holocene in northern Norway. *Holocene* 9:659-669

588 Leduc G, Vidal L, Tachikawa K, Rostek F, Sonzogni C, Beaufort L, Bard E (2007) Moisture transport across  
589 Central America as a positive feedback on abrupt climatic changes. *Nature* 445:908-911

590 Leduc G, Schneider R, Kim J-H, Lohmann G (2010) Holocene and Eemian sea surface temperature trends as  
591 revealed by alkenone and Mg/Ca paleothermometry. *Quat Sci Rev* 29:989-1004

592 Lee-Thorp JA, Holmgren K, Lauritzen S-E, Linge H, Moberg A, Partridge TC, Stevenson C, Tyson PD (2001)  
593 Rapid climate shifts in the southern African interior throughout the mid to late Holocene. *Geophys Res Lett*  
594 28:4507-4510

595 Levi C, Labeyrie L, Bassinot F, Guichard F, Cortijo E, Waelbroeck C, Caillon N, Duprat J, de Garidel-Thoron T,  
596 Elderfield H (2007) Low-latitude hydrological cycle and rapid climate changes during the last deglaciation.  
597 *Geochem Geophys Geosy* 8

598 Linge H, Lauritzen S-E, Anderson C, Hansen JK, Skoglund RØ, Sundqvist HS (2009) Stable isotope records for the  
599 last 10 000 years from Okshola cave (Fauske, northern Norway) and regional comparisons. *Clim Past*  
600 5:667-682

601 Luetscher M, Hoffmann DL, Frisia S, Spötl C (2011) Holocene glacier history from alpine speleothems, Milchbach  
602 cave, Switzerland. *Earth Planet. Sci Lett* 302:95-106

603 MARGO Project Members (2009) Constraints on the magnitude and patterns of ocean cooling at the Last Glacial  
604 Maximum. *Nat Geosci* 2:127-132

605 Marsland SJ, Haak H, Jungclaus JH, Latif M, Röske F (2003) The Max-Planck-Institute global ocean/sea ice model  
606 with orthogonal curvilinear coordinates. *Ocean Model* 5:91-127

607 Marti O, Braconnot P, Bellier J, Benshila R, Bony S, Brockmann P, Cadule P, Caubel A, Denvil S, Dufresne JL,  
608 Fairhead L, Filiberti M-A, Fichetef T, Foujols M-A, Friedlingstein P, Grandpeix J-Y, Hourdin F, Krinner  
609 G, Lévy C, Madec G, Musat I, De Noblet N, Polcher J, Talandier C (2005) The new IPSL climate system  
610 model: IPSL-CM4. Tech Rep, Inst Pierre Simon Laplace, Paris. <http://igcmg.ipsl.jussieu.fr/Doc/IPSLCM4>

611 Marti O, Braconnot P, Dufresne J-F, Bellier J, Benshila R, Bony S, Brockmann P, Cadule P, Caudel A, Codron F, de  
612 Noblet N, Denvil S, Fairhead L, Fichetef T, Foujols M-A, Friedlingstein P, Goosse H, Grandpeix J-Y,

613 Guilyardi E, Hourdin F, Idelkadi A, Kageyama M, Krinner G, Lévy C, Madec G, Mignot J, Musat I,  
614 Swingedouw D, Talandier C (2010) Key features of the IPSL ocean atmosphere model and its sensitivity to  
615 atmospheric resolution. *Clim Dyn* 35:1-26. doi: 10.1007/s00382-009-0640-6

616 Martin GM, Bellouin N, Collins WJ, Culverwell ID, Halloran PR, Hardiman SC, Hinton TJ, Jones CD, McDonald  
617 RE, McLaren AJ, O'Connor FM, Roberts MJ, Rodriguez JM, Woodward S, Best MJ, Brooks ME, Brown  
618 AR, Butchart N, Dearden C, Derbyshire SH, Dharssi I, Doutriaux-Boucher M, Edwards JM, Falloon PD,  
619 Gedney N, Gray LJ, Hewitt HT, Hobson M, Huddleston MR, Hughes J, Ineson S, Ingram WJ, James  
620 PM, Johns TC, Johnson CE, Jones A, Jones CP, Joshi MM, Keen AB, Liddicoat S, Lock AP, Maidens  
621 AV, Manners JC, Milton SF, Rae JGL, Ridley JK, Sellar A, Senior CA, Totterdell IJ, Verhoef A, Vidale  
622 PL, Wiltshire A (2011) HadGEM2 family of Met Office unified model climate configurations. *Geosci*  
623 *Model Dev Discuss* 4:765–841

624 Maslanik M, Stroeve J, Fowler C, Emery W (2011) Distribution and trends in Arctic sea ice age through spring  
625 2011. *Geophys Res Lett* 38, L13502, doi:10.1029/2011GL047735

626 McDermott F, Frisia S, Huang Y, Longinelli A, Spiro B, Heaton THE, Hawkesworth CJ, Borsato A, Keppens E,  
627 Fairchild IJ, van der Berg K, Verheyden S, Selmo E (1999) Holocene climate variability in Europe:  
628 Evidence from  $\delta^{18}\text{O}$ , textural and extension-rate variations in three speleothems. *Quat Sci Rev* 18:1021-  
629 1038

630 McDermott F, Mattey DP, Hawkesworth CJ (2001) Centennial-scale Holocene climate variability revealed by a  
631 high-resolution speleothem  $\delta^{18}\text{O}$  record from SW Ireland. *Sci* 294:1328-1331

632 McGarry S, Bar-Matthews M, Matthews A, Vaks A, Schilman B, Ayalon A (2004) Constraints on hydrological and  
633 paleotemperature variations in the Eastern Mediterranean region in the last 140 ka given by the  $\delta D$  values  
634 of speleothem fluid inclusions. *Quat Sci Rev* 23:919-934

635 Mikolajewicz U, Vizcaíno M, Jungclaus J, Schurgers G (2007) Effect of ice sheet inter- actions in anthropogenic  
636 climate change simulations. *Geophys Res Lett* 34:L18706

637 Minoshima K, Kawahata H, Ikehara K (2007) Changes in biological production in the mixed water region (MWR)  
638 of the northwestern North Pacific during the last 27 kyr. *Palaeogeogr, Palaeoclimatol, Palaeoecol* 254:430-  
639 447

640 Moreno A, Stoll H, Jiménez-Sánchez M, Cacho I, Valero-Garcés B, Ito E, Edwards RL (2010) A speleothem record  
641 of glacial (25-11.6 kyr BP) rapid climatic changes from northern Iberian Peninsula. *Glob Planet Chang*  
642 71:218-231

643 Niggemann S, Mangini A, Richter DK, Wurth G (2003) A paleoclimate record of the last 17,600 years in  
644 stalagmites from the B7 cave, Sauerland, Germany. *Quat Sci Rev* 22:555-567

645 Notaro M, Liu Z, Gallimore R, Vavrus SJ, Kutzbach JE (2005) Simulated and observed preindustrial to modern  
646 vegetation and climate changes. *J Clim* 18:3650–3671

647 Onac BP, Constantin S, Lundberg J, Lauritzen SE (2002) Isotopic climate record in a Holocene stalagmite from  
648 Ursilor Cave, Romania. *J Quat Sci* 17:319-327

649 Otto-Bliesner BL, Brady EC, Clauzet G, Tomas R, Levis S, Kothavala Z (2006) Last Glacial Maximum and  
650 Holocene Climate in CCSM3. *J Clim* 19:2526–2544

651 Overpeck JT, Webb III T, Prentice IC (1985) Quantitative interpretation of fossil pollen spectra: dissimilarity  
652 coefficients and the method of modern analogs. *Quat Res* 23:87-108

653 Pahnke K, Sachs JP (2006) Sea surface temperatures of southern midlatitudes 0-160 kyr BP. *Paleoceanogr* 21.  
654 doi: 10.1029/2005PA001191

655 Partin JW, Cobb KM, Adkins JF, Clark B, Fernandez DP (2007) Millennial-scale trends in west Pacific warm pool  
656 hydrology since the Last Glacial Maximum. *Nat* 449:452-455

657 Pausata FSR, Battisti DS, Nisancioglu KH, Bitz CM (2011) Chinese stalagmite  $\delta^{18}\text{O}$  controlled by changes in the  
658 Indian monsoon during a simulated Heinrich event. *Nat Geosci* 4:474-480

659 Peck VL, Hall IR, Zahn R, Elderfield H (2008) Millennial-scale surface and subsurface paleothermometry from the  
660 northeast Atlantic, 55-8 ka BP. *Paleoceanogr* 23 doi: 10.1029/2008PA001631

661 Peltier WR (2004) Global glacial isostasy and the surface of the ice-age Earth: the ICE-5G (VM2) model and  
662 GRACE. *Annu Rev Earth Planet Sci* 32:111

663 Peterse F, Prins MA, Beets CJ, Troelstra SR, Zheng H, Gu Z, Schouten S, Sinninghe Damsté JS (2011) Decoupled  
664 warming and monsoon precipitation in East Asia over the last deglaciation. *Earth Planet Sci Lett* 301:256-  
665 264

666 Phipps SJ (2006) The CSIRO Mk3L Climate System Model, Technical Report No. 3, Antarctic Climate &  
667 Ecosystems CRC, Hobart, Tasmania, Australia, pp 236

668 Phipps SJ, Rotstayn LD, Gordon HB, Roberts JL, Hirst AC, Budd WF (2011) The CSIRO Mk3L climate system  
669 model version 1.0 - Part 1: Description and evaluation. *Geosci Model Dev* 4:483-509

670 Prentice IC, Cramer W, Harrison SP, Leemans R, Monserud RA, Solomon AM (1992) A global biome model based  
671 on plant physiology and dominance, soil properties and climate. *J Biogeogr* 19:117-13

672 Prentice IC, Sykes MT, Cramer W (1993) A simulation model for the transient effects of climate change on forest  
673 landscapes. *Ecol Model* 65:51-70

674 Quigley MC, Horton T, Hellstrom JC, Cupper ML, Sandiford M (2010) Holocene climate change in arid Australia  
675 from speleothem and alluvial records. *Holocene* 20:1093-1104

676 Railsback LB, Liang F, Romaní JRV, Grandal-d'Anglade A, Rodríguez MV, Fidalgo LS, Mosquera DF, Cheng H,  
677 Edwards RL (2011) Petrographic and isotopic evidence for Holocene long-term climate change and shorter-  
678 term environmental shifts from a stalagmite from the Serra do Courel of northwestern Spain, and  
679 implications for climatic history across Europe and the Mediterranean. *Palaeogeogr, Palaeoclimatol,*  
680 *Palaeoecol* 305:172–184

681 Rayner NA, Parker DE, Horton EB, Folland CK, Alexander LV, Rowell DP, Kent EC, Kaplan A (2003) Global  
682 analyses of sea surface temperature, sea ice, and night marine air temperature since the late nineteenth  
683 century. *J Geophys Res* 108:D14, 4407

684 Renssen H, Goosse H, Fichet T, Brovkin V, Driesschaert E, Wolk F (2005) Simulating the Holocene climate  
685 evolution at northern high latitudes using a coupled atmosphere-sea ice-ocean-vegetation model. *Clim Dyn*  
686 24:23–43

687 Roeckner E, Bäuml G, Bonaventura L, Brokopf R, Esch M, Giorgetta M, Hagemann S, Kirchner I, Kornbluh L,  
688 Manzini E, Rhodin A, Schlese U, Schulzweida U, Tompkins A (2003) The atmospheric general circulation  
689 model ECHAM5. MPI Report No. 349

690 Rotstayn L, Collier MA, Dix MR, Feng Y, Gordon HB, O’Farrell SP, Smith IN, Syktus J (2010) Improved  
691 simulation of Australian climate and ENSO-related climate variability in a GCM with an interactive aerosol  
692 treatment. *Int J Clim* 30:1067-1088

693 Royer JF (2008) ENSEMBLES STREAM2 CNRM-CM33 20C3M run1, daily values. World Data Center for  
694 Climate. CERA-DB "ENSEMBLES2\_CNCR33\_20C3M\_1\_D" [http://cera-  
695 www.dkrz.de/WDC/Compact.jsp?acronym=ENSEMBLES2\\_CNCR33\\_20C3M\\_1\\_D](http://cera-<br/>
695 www.dkrz.de/WDC/Compact.jsp?acronym=ENSEMBLES2_CNCR33_20C3M_1_D)

696 Sachs JP, Anderson RF, Lehman SJ (2001) Glacial surface temperatures of the southeast Atlantic Ocean. *Sci*  
697 293:2077-2079

698 Sawada K, Handa N (1998) Variability of the path of the Kuroshio ocean current over the past 25,000 years. *Nat*  
699 392:592-595

700 Schefuss E, Schouten S, Schneider RR (2005) Climatic controls on central African hydrology during the past 20,000  
701 years. *Nat* 437:1003-1006

702 Schmidt MW, Spero HJ, Lea DW (2004) Links between salinity variation in the Caribbean and North Atlantic  
703 thermohaline circulation. *Nat* 428:160-163

704 Schmidt GA, Ruedy R, Hansen JE, Aleinov I, Bell N, Bauer M, Bauer S, Cairns B, Canuto V, Cheng Y, Del Genio  
705 A, Faluvegi G, Friend AD, Hall TM, Hu Y, Kelley M, Kiang NY, Koch D, Lacis AA, Lerner J, Lo KK,  
706 Miller RL, Nazarenko L, Oinas V, Perlwitz J, Perlwitz J, Rind D, Romanou A, Russell GL, Sato M,  
707 Shindell DT, Stone PH, Sun S, Tausnev N, Thresher D, Yao M-S (2006) Present day atmospheric  
708 simulations using GISS ModelE: Comparison to in-situ, satellite and reanalysis data. *J Clim* 19:153-192

709 Schmittner A, Urban NM, Shakun JD, Mahowald NM, Clark PU, Bartlein PJ, Mix AC, Rosell-Melé A (2011)  
710 Climate sensitivity estimated from temperature reconstructions of the Last Glacial Maximum. *Sci*  
711 334:1385-1388

712 Scholz D, Frisia S, Borsato A, Spötl C, Fohlmeister J, Mudelsee M, Miorandi R, Mangini A (2012) Holocene  
713 climate variability in North-Eastern Italy: potential influence of the NAO and solar activity recorded by  
714 speleothem data. *Clim Past Discuss* 8:909–952

715 Shakun JD, Burns SJ, Fleitmann D, Kramers J, Matter A, Al-Subary A (2007) A high-resolution, absolute-dated  
716 deglacial speleothem record of Indian Ocean climate from Socotra Island, Yemen. *Earth Planet Sci Lett*  
717 259:442-456

718 Southon J, Noronha AL, Cheng H, Edwards LR, Wang Y (2012) A high-resolution record of atmospheric <sup>14</sup>C based  
719 on Hulu Cave speleothem H82. *Quat Sci Rev* 33:32-41

720 Springer GS, Rowe HD, Hardt B, Edwards RL, Cheng H (2008) Solar forcing of Holocene droughts in a stalagmite  
721 record from West Virginia in east-central North America. *Geophys Res Lett* 35:L17703

722 Steinke S, Kienast M, Groeneveld J, Lin L-C, Chen M-T, Rendle-Bühning R (2008) Proxy dependence of the  
723 temporal pattern of deglacial warming in the tropical South China Sea: toward resolving seasonality. *Quat*  
724 *Sci Rev* 27:688-700

725 Stenni B, Masson-Delmotte V, Selmo E, Oerter H, Meyer H, Röthlisberger R, Jouzel J, Cattani O, Falourd S,  
726 Fischer H, Hoffmann G, Lacumin P, Johnsen SJ, Minster B, Udisti R (2010) The deuterium excess records  
727 of EPICA Dome C and Dronning Maud Land ice cores (East Antarctica). *Quat Sci Rev* 29:146-159

728 Stott L, Timmermann A, Thunell R (2007) Southern hemisphere and deep-sea warming led deglacial atmospheric  
729 CO<sub>2</sub> rise and tropical warming. *Sci* 318:435-438

730 Stríkis NM, Cruz FW, Cheng H, Karmann I, Edwards RL, Vuille M, Wang X, de Paula MS, Novello VF, Auler AS  
731 (2011) Abrupt variations in South American monsoon rainfall during the Holocene based on a speleothem  
732 record from central-eastern Brazil. *Geol* 39:1075-1078

733 Talma AS, Vogel JC (1992) Late Quaternary paleotemperatures derived from a speleothem from Cango Caves,  
734 Cape Province, South-Africa. *Quat Res* 37:203-213

735 Tămaş, T, Onac BP, Bojar AV (2005) Lateglacial-Middle Holocene stable isotope records in two coeval stalagmites  
736 from the Bihor Mountains, NW Romania. *Geol Quart* 49:185-194

737 Tarboton DG, Luce CH (1996) Utah Energy Balance Snow Accumulation and Melt Model (UEB): Computer model  
738 technical description and users guide. Utah Water Research Laboratory, Utah State University.

739 Tierney JE, Russell JM, Huang Y, Sinninghe Damsté JS, Hopmans EC, Cohen AS (2008) Northern hemisphere  
740 controls on tropical southeast African climate during the past 60,000 years. *Sci* 322:252-255

741 Tran L, Duckstein L (2002) Comparison of fuzzy numbers using a fuzzy distance measure. *Fuzzy Sets Syst*  
742 130:331-341

743 Tremaine DM, Froelich PN, Wang Y (2011) Speleothem calcite formed in situ: Modern calibration of  $\delta^{18}\text{O}$  and  $\delta^{13}\text{C}$   
744 paleoclimate proxies in a continuously-monitored natural cave system. *Geochim Cosmochim Acta* 75:4929-  
745 4950

746 Vaks A, Bar-Matthews M, Ayalon A, Matthews A, Frumkin A, Dayan U, Halicz L, Almogi-Labin A, Schilman B  
747 (2006) Paleoclimate and location of the border between Mediterranean climate region and the Sahara-  
748 Arabian Desert as revealed by speleothems from the northern Negev Desert, Israel. *Earth Planet Sci Lett*  
749 249:384-399

750 van Beynen PE, Schwarcz HP, Ford DC (2004) Holocene climatic variation recorded in a speleothem from McFail's  
751 cave, New York. *Cave and Karst Stud* 66:20-27

752 van Breukelen MR, Vonhof HB, Hellstrom JC, Wester WCG, Kroon D (2008) Fossil dripwater in stalagmites  
753 reveals Holocene temperature and rainfall variation in Amazonia. *Earth Planet Sci Lett* 275:54-60

754 Verheyden S, Nader FH, Cheng HJ, Edwards LR, Swennen R (2008) Paleoclimatic reconstruction in the Levant  
755 region from the geochemistry of a Holocene stalagmite from the Jeita cave, Lebanon. *Quat Res* 70:368-381

756 Voldoire A, Sanchez-Gomez E, Salas y Mélia D, Decharme B, Cassou C, Sénési S, Valcke S, Beau I, Alias A,  
757 Chevallier M, Déqué M, Deshayes J, Douville H, Fernandez E, Madec G, Maisonnave E, Moine M-P,  
758 Planton MS, Saint-Martin D, Szopa S, Tyteca S, Alkama R, Belamari S, Braun A, Coquart L, Chauvin F  
759 (2012) The CNRM-CM5.1 global climate model: description and basic evaluation. *Clim Dyn.*  
760 doi:10.1007/s00382-011-1259-y

761 Vollweiler N, Scholz D, Mühlinghaus C, Mangini A, Spötl C (2006) A precisely dated climate record for the last 9  
762 kyr from three high alpine stalagmites, Spannagel Cave, Austria. *Geophys Res Lett* 33:L20703.  
763 doi:10.1029/2006GL027662

764 Waelbroeck C, Duplessy JC, Michel E, Labeyrie L, Paillard D, Duprat J (2001) The timing of the last deglaciation  
765 in North Atlantic climate records. *Nat* 412:724-727

766 Wagner JDM, Cole JE, Beck JW, Patchett PJ, Henderson GM, Barnett HR (2010) Moisture variability in the  
767 southwestern United States linked to abrupt glacial climate change. *Nat Geosci* 3:110-113

768 Wang X, Auler AS, Edwards RL, Cheng H, Ito E, Wang Y, Kong X, Solheid M (2007) Millennial-scale  
769 precipitation changes in southern Brazil over the past 90,000 years. *Geophys Res Lett* 34:L23701

770 Wang YJ, Cheng H, Edwards RL, An ZS, Wu JY, Shen C-C, Dorale JA (2001) A high-resolution absolute-dated late  
771 Pleistocene monsoon record from Hulu Cave, China. *Sci* 294:2345-2348

772 Wang Y, Cheng H, Edwards RL, He Y, Kong X, An Z, Wu J, Kelly MJ, Dykoski CA, Li X (2005) The Holocene  
773 Asian monsoon: Links to solar changes and North Atlantic climate. *Sci* 308:854-857

774 Wang Y, Cheng H, Edwards RL, Kong X, Shao X, Chen S, Wu J, Jiang X, Wang X, An Z (2008) Millennial- and  
775 orbital-scale changes in the East Asian monsoon over the past 224,000 years. *Nat* 451:1090-1093

776 Watanabe S, Hajima T, Sudo K, Nagashima T, Takemura T, Okajima H, Nozawa T, Kawase H, Abe M, Yokohata  
777 T, Ise T, Sato H, Kato E, Takata K, Emori S, Kawamiya M (2011) MIROC-ESM: model description and  
778 basic results of CMIP5-20c3m experiments. *Geosci Mod Dev* 4:845-872

779 Webb T III, Bryson RA (1972) Late- and postglacial climatic change in the northern Midwest, U.S.A.: quantitative  
780 estimates derived from fossil pollen spectra by multivariate statistical analysis. *Quaternary Research* 2:70-  
781 115

782 Wei GJ, Deng WF, Liu Y, Li XH (2007) High-resolution sea surface temperature records derived from foraminiferal  
783 Mg/Ca ratios during the last 260 ka in the northern South China Sea. *Palaeogeogr, Palaeoclimatol,*  
784 *Palaeoecol* 250:126-138

785 Weldeab S, Schneider RR, Kölling M, Wefer G (2005) Holocene African droughts relate to eastern equatorial  
786 Atlantic cooling. *Geol* 33:981-984

787 Weldeab S, Schneider RR, Kölling M (2006) Deglacial sea surface temperature and salinity increase in the western  
788 tropical Atlantic in synchrony with high latitude climate instabilities. *Earth Planet Sci Lett* 241:699-706

789 Weldeab S, Lea DW, Schneider RR, Andersen N (2007) 155,000 years of West African monsoon and ocean thermal  
790 evolution. *Sci* 316:1303-1307

791 Whittaker TE, Hendy CH, Hellstrom JC (2011) Abrupt millennial-scale changes in intensity of Southern  
792 Hemisphere westerly winds during marine isotope stages 2-4. *Geol* 39:455-458

793 Williams PW, King DNT, Zhao J-X, Collerson KD (2004) Speleothem master chronologies: combined Holocene  
794  $^{18}\text{O}$  and  $^{13}\text{C}$  records from the North Island of New Zealand and their palaeoenvironmental interpretation.  
795 *Holocene* 14:194-208

796 Williams PW, King DNT, Zhao J-X, Collerson KD (2005) Late Pleistocene to Holocene composite speleothem  $^{18}\text{O}$   
797 and  $^{13}\text{C}$  chronologies from South Island, New Zealand - did a global Younger Dryas really exist? *Earth*  
798 *Planet Sci Lett* 230:301-317

799 Wu TW, Yu RC, Zhang F (2008) A modified dynamic framework for atmospheric spectral model and its  
800 application. *J Atmos Sci* 65:2235–2253

801 Wu TW, Yu R, Zhang F, Wang Z, Dong M, Wang L, Jin X, Chen D, Li L (2010) The Beijing Climate Center  
802 atmospheric general circulation model: description and its performance for the present-day climate. *Clim*  
803 *Dyn* 34:123–147

804 Wurth G, Niggemann S, Richter DK, Mangini A (2004) The younger Dryas and Holocene climate record of a  
805 stalagmite from Hölloch Cave (Bavarian Alps, Germany). *J Quat Sci* 19:291-298

806 Xia Q, Zhao J-X, Collerson KD (2001) Early-Mid Holocene climatic variations in Tasmania, Australia: multi-proxy  
807 records in a stalagmite from Lynds Cave. *Earth Planet Sci Lett* 194:177-187

808 Xu J, Holbourn A, Kuhnt W, Jian Z, Kawamura H (2008) Changes in the thermocline structure of the Indonesian  
809 outflow during Terminations I and II. *Earth Planet Sci Lett* 273:152-162

810 Yu YQ, Yu RC, Zhang XH, Liu HL (2002) A flexible coupled ocean-atmosphere general circulation model. *Adv*  
811 *Atmos Sci* 19:169–190

812 Yu YQ, Zhang XH, Guo YF (2004) Global coupled ocean-atmosphere general circulation models in Lasg/lap. *Adv*  
813 *Atmos Sci* 21:444–455

814 Yuan D, Cheng H, Edwards RL, Dykoski CA, Kelly MJ, Zhang M, Qing J, Lin Y, Wang Y, Wu J, Dorale JA, An Z,  
815 Cai Y (2004) Timing, duration, and transitions of the last interglacial Asian monsoon. *Sci* 304:575-578

816 Yukimoto S, Noda A, Kitoh A, Hosaka M, Yoshimura H, Uchiyama T, Shibata K, Arakawa O, Kusunoki S (2006)  
817 Present-day climate and climate sensitivity in the Meteorological Research Institute Coupled GCM Version  
818 2.3 (Mri-Cgcm2.3). *J Meteorol Soc Japan* 84:333–363

819 Yukimoto S, Yoshimura H, Hosaka M, Sakami T, Tsujino H, Hirabara M, Tanaka TY, Deushi M, Obata A, Nakano  
820 H, Adachi Y, Shindo E, Yabu S, Ose T, Kitoh A (2011) Meteorological Research Institute-Earth System  
821 Model v1 (MRI-ESM1) – Model Description. Tech Rep Meteor Res Inst 64, pp 88

822 Zanchetta G, Drysdale RN, Hellstrom JC, Fallick AE, Isola I, Gagan MK, Pareschi MT (2007) Enhanced rainfall in  
823 the Western Mediterranean during the deposition of sapropel S1: stalagmite evidence from Corchia cave  
824 (Central Italy). *Quat Sci Rev* 26:279-286

825 Ziegler M, Nürnberg D, Karas C, Tiedemann R, Lourens LJ (2008) Persistent summer expansion of the Atlantic  
826 Warm Pool during glacial abrupt cold events. *Nat Geosci* 1:601-605

827

828 **Figure S1.** Maps showing the location of speleothem records which met the selection criteria for reliability and are  
829 therefore used to provide either qualitative or quantitative estimates of temperature and/or precipitation for the LGM  
830 and MH. Qualitative and quantitative estimates of changes in (A) LGM (21ka) temperature, (B) LGM (21 ka)  
831 precipitation, (C) MH (6 ka) temperature and (D) MH (6 ka) precipitation, have been combined into a three part  
832 scale: cooler/no (significant) change/warmer for temperature, wetter/no (significant) change/drier for precipitation.  
833

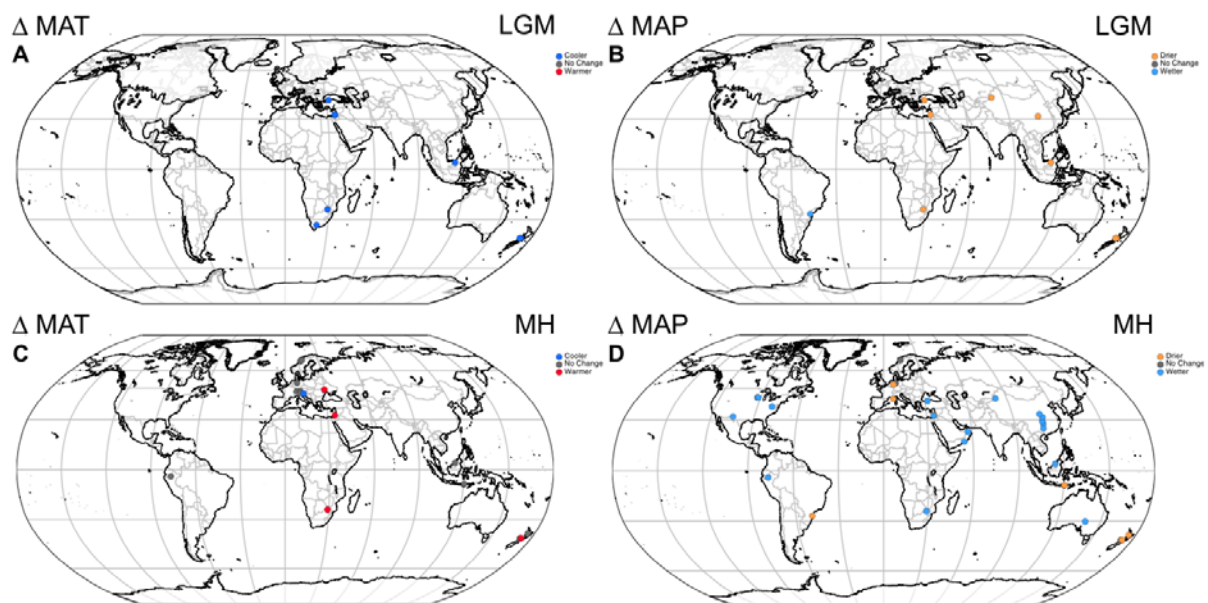

834

835



836 **Figure S2.** Quantitative reconstructions of changes in (A) mean annual temperature (MAT), (B) mean temperature  
 837 of the coldest month (MTCO), (C) mean temperature of the warmest month (MTWA), (D) growing degree days  
 838 above a base of 5°C (GDD5), (E) mean annual precipitation (MAP) and (F)  $\alpha$ , the ratio of actual to equilibrium  
 839 evapotranspiration ( $\alpha$ ) at the LGM.  
 840  
 841

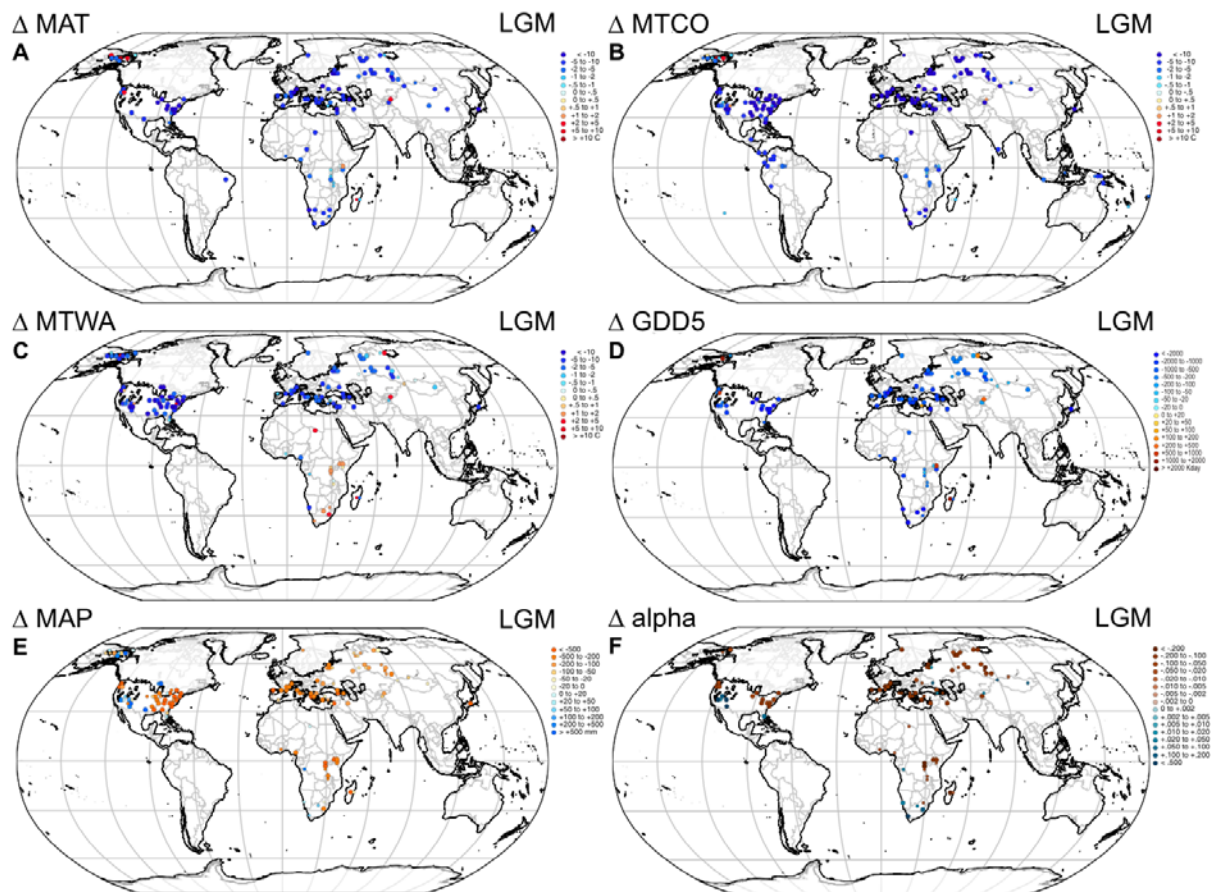

842  
 843

844 **Figure S3.** Quantitative reconstructions of (A) mean annual temperature (MAT), (B) mean temperature of the  
 845 coldest month (MTCO), (C) mean temperature of the warmest month (MTWA), (D) growing degree days above a  
 846 base of 5°C (GDD5), (E) mean annual precipitation (MAP) and (F)  $\alpha$ , the ratio of actual to equilibrium  
 847 evapotranspiration ( $\alpha$ ) at the MH.  
 848

849

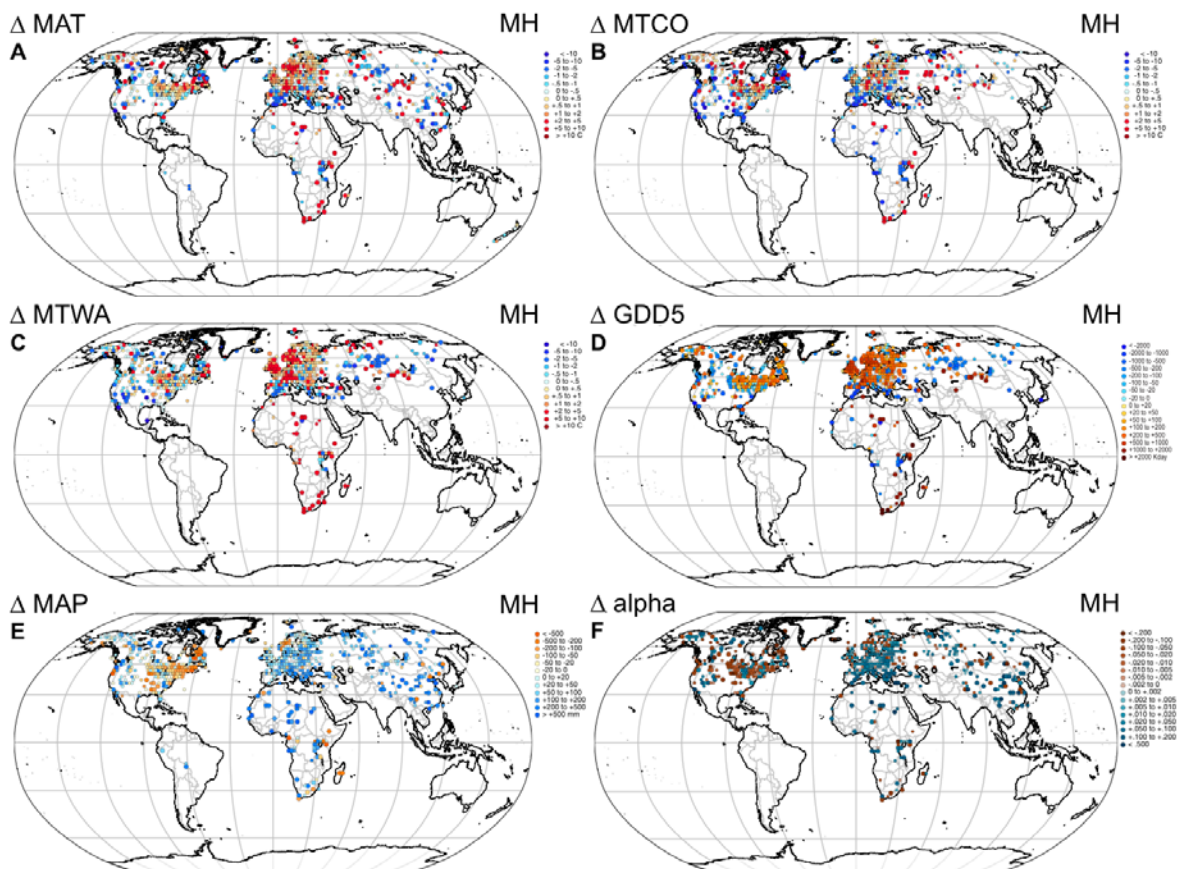

850

851

852 **Figure S4.** Quantitative reconstructions of changes in (A) mean annual sea-surface temperature (SSTann), (B)  
 853 summer sea-surface temperature (SSTsum), (C) winter sea-surface temperature SSTwin, and (D) number of months  
 854 with sea ice cover (SInmon) at the LGM.  
 855

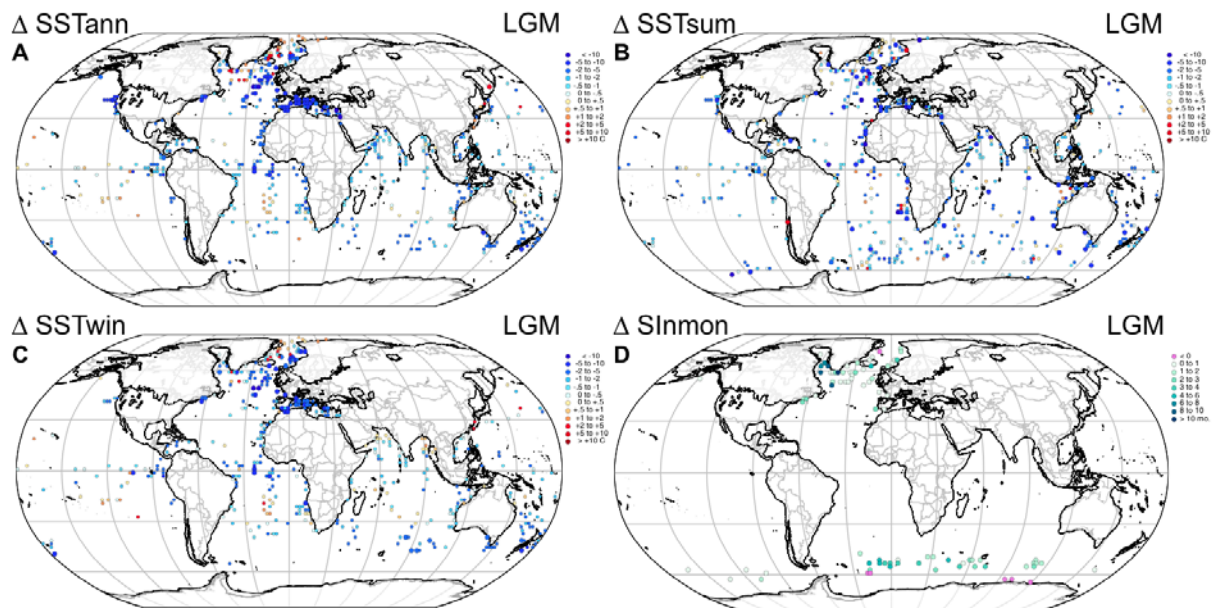

856

857

858 **Figure S5.** Quantitative reconstructions of mean annual sea-surface temperature (SSTann) at the MH.

859

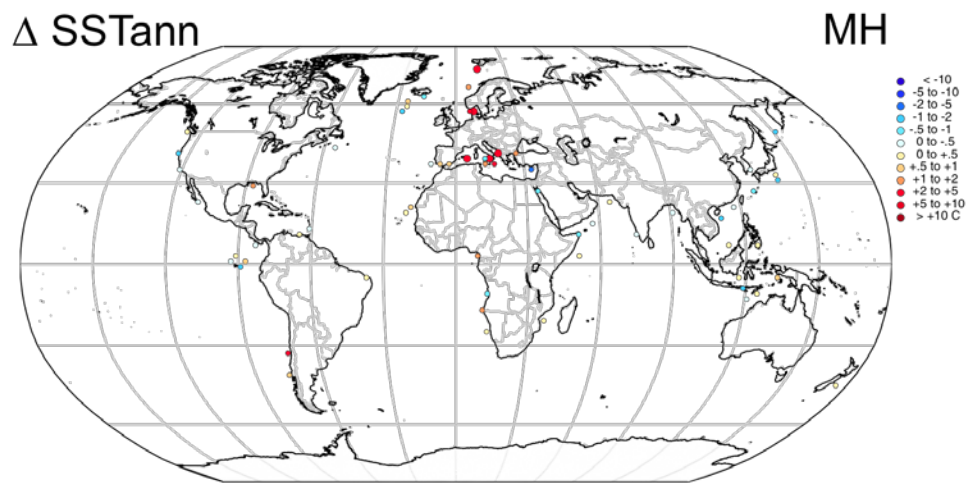

860

861

862 **Figure S6.** Comparison of simulated and reconstructed zonal mean annual sea-surface temperature (SSTann) at the  
 863 LGM. The panels show the simulated and reconstructed values in 15° latitude bands from S to N. The median value  
 864 of the observations is shown as a black vertical line, the IQR by dark grey shading and the 5-9 percentile limits by  
 865 light grey shading. The models are color-coded to show whether they are PMIP2 or CMIP5 simulations, and  
 866 whether they are ocean-atmosphere (OA), ocean-atmosphere-vegetation (OAV) or OA carbon-cycle (OAC) models.  
 867 The simulated median for each model is shown by a vertical line, the box represents the IQR and the whiskers the  
 868 95% limits. The final panel shows SSTann by latitude for all models and all ensembles compared to the  
 869 reconstructions.  
 870

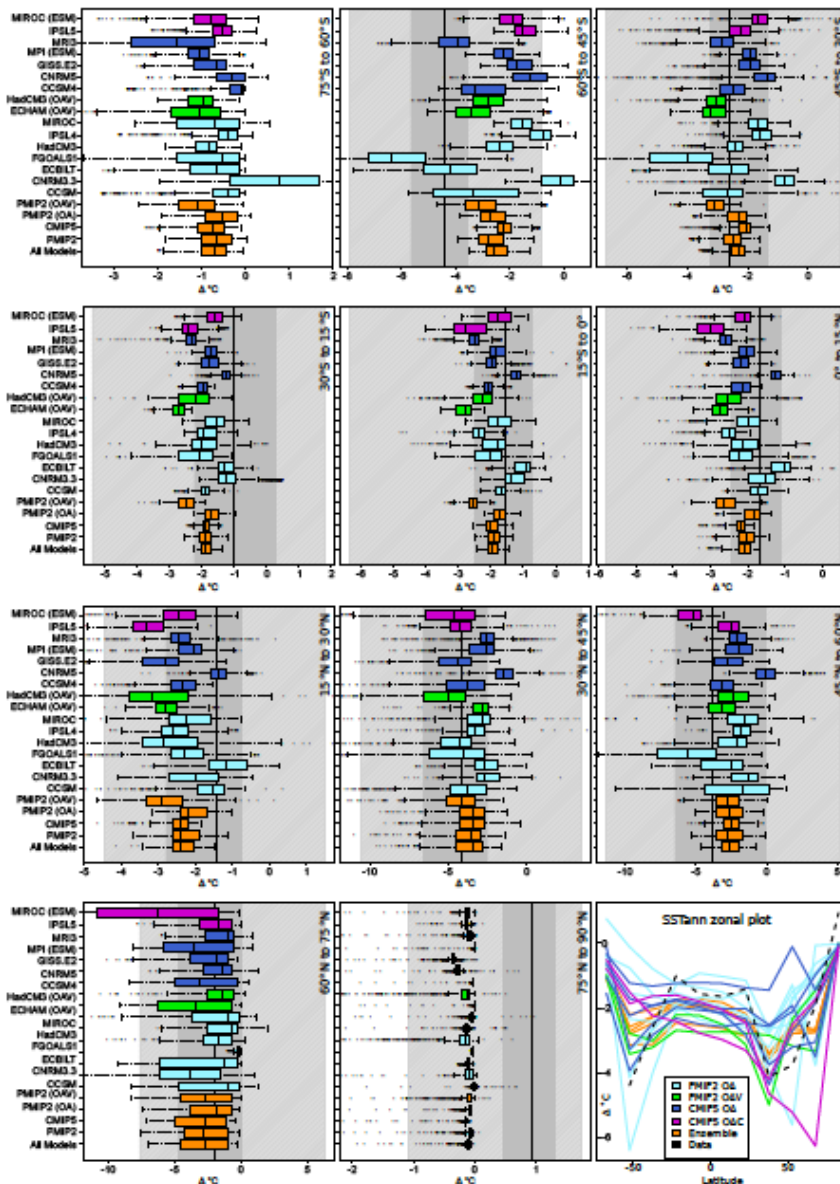

871

872

873 **Figure S7.** Comparison of simulated and reconstructed zonal sea-surface temperatures at the MH. The panels show  
 874 the simulated and reconstructed values in 15° latitude bands from S to N. The median value of the observations is  
 875 shown as a black vertical line, the IQR by dark grey shading and the 5 to 95 percentile limits by light grey shading.  
 876 The models are color-coded to show whether they are PMIP2 or CMIP5 simulations, and whether they are ocean-  
 877 atmosphere (OA), ocean-atmosphere-vegetation (OAV) or OA carbon-cycle (OAC) models. The simulated median  
 878 for each model is shown by a vertical line, the box represents the IQR and the whiskers the 5 to 95 percentile limits.  
 879

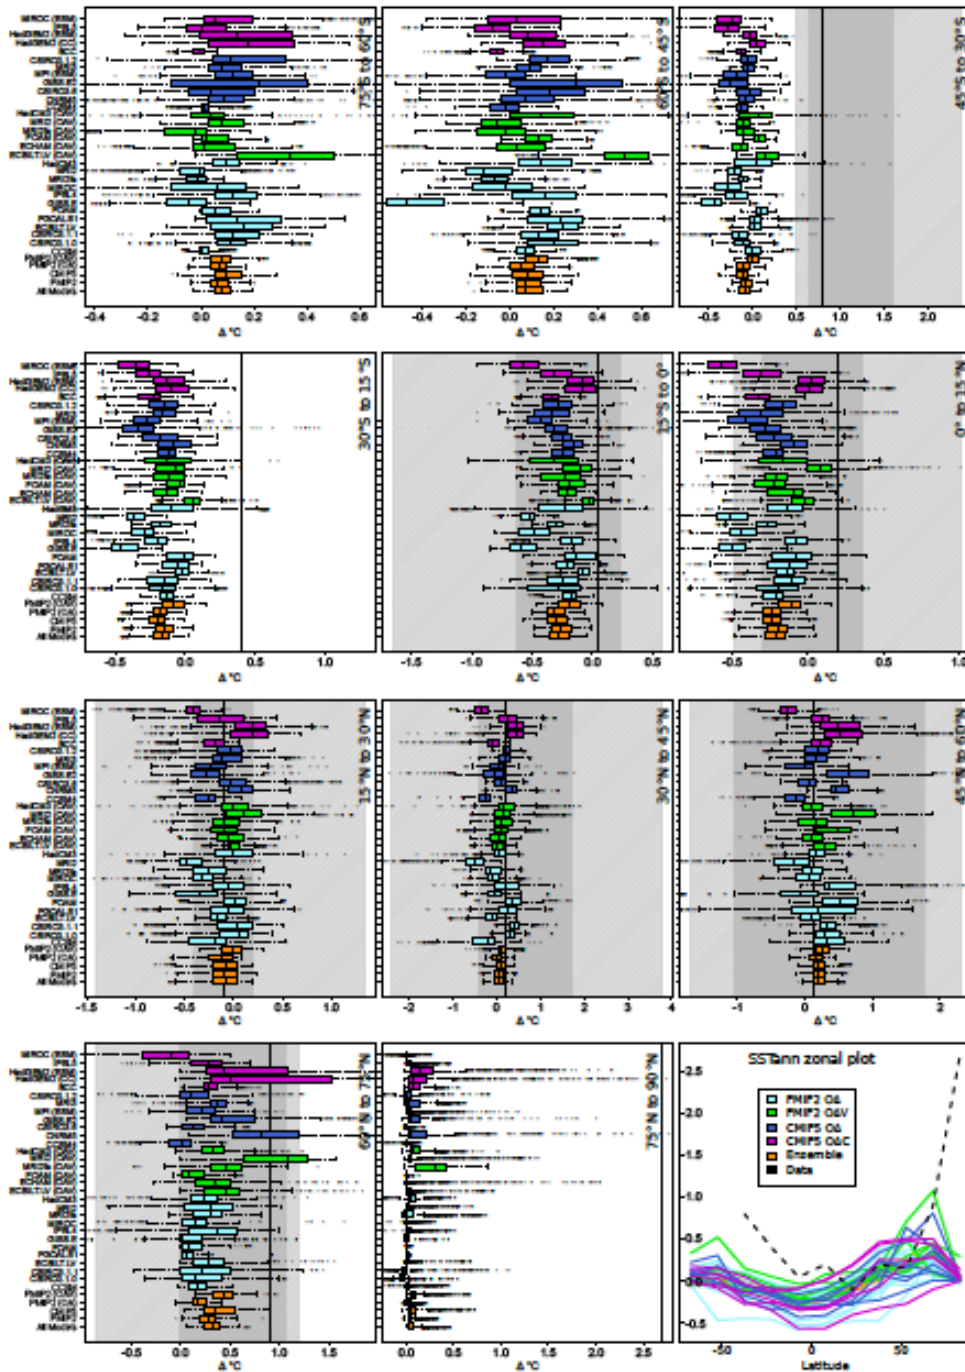

880

881

**Table S1.** Summary of data used for temperature reconstructions from ice core records.

| Site    | Latitude (°) | Longitude (°) | Modern <sup>18</sup> O (‰) | LGM <sup>18</sup> O (‰) | Anomaly <sup>18</sup> O (‰) | Sea water correction (‰) | Temperature anomaly (°C) | Error bar slope | LGM-present elevation change (m) | Elevation correction (°C) | Total temperature change (°C) |
|---------|--------------|---------------|----------------------------|-------------------------|-----------------------------|--------------------------|--------------------------|-----------------|----------------------------------|---------------------------|-------------------------------|
| Vostok  | -78.47       | 106.80        | -57.03                     | -61.12                  | 4.08                        | 5.21                     | -6.51                    | 1.653           | 125                              | 1.25                      | -7.76                         |
| EDC     | -75.10       | 123.35        | -50.82                     | -56.01                  | 5.20                        | 6.33                     | -7.91                    | 2.009           | 125                              | 1.25                      | -9.16                         |
| EDML    | -75.00       | 0.07          | -44.91                     | -50.13                  | 5.22                        | 6.36                     | -7.95                    | 2.018           | 100                              | 1.00                      | -8.95                         |
| TALDICE | -72.82       | 159.18        | -36.46                     | -41.46                  | 5.00                        | 6.15                     | -7.69                    | 1.952           | 100                              | 1.00                      | -8.69                         |
| Dome F  | -77.32       | 39.67         | -55.10                     | -59.53                  | 4.42                        | 5.55                     | -6.94                    | 1.762           | 125                              | 1.25                      | -8.19                         |

**Table S2.** Sites from Schmittner et al. (2011) that are not included in other data sets, and have therefore been incorporated into the gridded data sets of quantitative climate variables used here for model evaluation.

| Site            | Latitude (°) | Longitude (°) | Elevation | Indicator         | Reference                 |
|-----------------|--------------|---------------|-----------|-------------------|---------------------------|
| NA 87-22        | 55.5         | -14.7         | -2161     | foram assemblages | Waelbroeck et al. (2001)  |
| MD01-2461       | 51.8         | -12.9         | -1153     | Mg/Ca             | Peck et al. (2008)        |
| CH 69-09        | 41.8         | -47.4         | -4100     | foram assemblages | Waelbroeck et al. (2001)  |
| PC-6            | 40.4         | 143.5         | -2215     | UK'37             | Minoshima et al. (2007)   |
| SU81-18         | 37.8         | -10.2         | -3135     | foram assemblages | Waelbroeck et al. (2001)  |
| MD01-2421       | 36.0         | 141.8         | -2224     | UK'37             | Isono et al. (2009)       |
| KT92-17 St. 14  | 32.6         | 138.6         | -3252     | UK'37             | Sawada and Handa (1998)   |
| KNR140-51GGC    | 32.6         | -76.3         | -1790     | Mg/Ca             | Carlson et al. (2008)     |
| GeoB 7702-3     | 31.7         | 34.1          | -562      | TEX86             | Castañeda et al. (2010)   |
| MD98-2195       | 31.6         | 129.0         | -746      | UK'37             | Ijiri et al. (2005)       |
| MD02-2575       | 29.0         | -87.1         | -847      | Mg/Ca             | Ziegler et al. (2008)     |
| GeoB 5844-2     | 27.7         | 34.7          | -963      | UK'37             | Arz et al. (2003)         |
| EN32-PC6        | 27.0         | -91.3         | -2280     | Mg/Ca             | Flower et al. (2004)      |
| ODP 658C        | 20.8         | -18.6         | -2263     | foram assemblages | deMenocal et al. (2000)   |
| ODP 1144        | 20.1         | 117.6         | -2037     | Mg/Ca             | Wei et al. (2007)         |
| 74KL            | 14.3         | 57.3          | -3212     | UK'37             | Huguet et al. (2006)      |
| 74KL            | 14.3         | 57.3          | -3212     | TEX86             | Huguet et al. (2006)      |
| VM28-122        | 11.6         | -78.4         | -3623     | Mg/Ca             | Schmidt et al. (2004)     |
| NIOP-905        | 10.8         | 51.9          | -1567     | UK'37             | Huguet et al. (2006)      |
| NIOP-905        | 10.8         | 51.9          | -1567     | TEX86             | Huguet et al. (2006)      |
| MD02-2529       | 8.2          | -84.1         | -1619     | UK'37             | Leduc et al. (2007)       |
| ME0005A-43JC    | 7.9          | -83.6         | -1368     | Mg/Ca             | Benway et al. (2006)      |
| MD01-2390       | 6.6          | 113.4         | -1545     | UK'37             | Steinke et al. (2008)     |
| MD01-2390       | 6.6          | 113.4         | -1545     | Mg/Ca             | Steinke et al. (2008)     |
| MD03-2707       | 2.5          | 9.4           | -1295     | Mg/Ca             | Weldeab et al. (2007)     |
| GeoB 4905       | 2.5          | 9.4           | -1328     | Mg/Ca             | Weldeab et al. (2005)     |
| ME0005A-24JC    | 0.0          | -86.5         | -2941     | UK'37             | Kienast et al. (2006)     |
| V21-30          | -1.2         | -89.7         | -617      | UK'37             | Koutavas and Sachs (2008) |
| V19-28          | -2.4         | -84.7         | -2720     | UK'37             | Jaeschke et al. (2007)    |
| GeoB 3910       | -4.2         | -36.3         | -2362     | UK'37             | Jaeschke et al. (2007)    |
| GeoB 3129       | -4.6         | -36.6         | -830      | Mg/Ca             | Weldeab et al. (2006)     |
| MD98-2176       | -5.0         | 133.4         | -2382     | Mg/Ca             | Stott et al. (2007)       |
| GeoB 6518-1     | -5.6         | 11.2          | -962      | UK'37             | Schefuss et al. (2005)    |
| MD98-2165       | -9.7         | 118.4         | -2100     | Mg/Ca             | Levi et al. (2007)        |
| MD98-2170       | -10.6        | 125.4         | -832      | Mg/Ca             | Xu et al. (2008)          |
| MD01-2378       | -13.1        | 121.8         | -1783     | Mg/Ca             | Farmer et al. (2005)      |
| ODP 1084B       | -25.5        | 13.0          | -1992     | Mg/Ca             | Farmer et al. (2005)      |
| KNR159-5-36GGC  | -27.5        | -46.5         | -1268     | Mg/Ca             | Carlson et al. (2008)     |
| GeoB 7139-2     | -30.2        | -72.0         | -3270     | UK'37             | Kaiser et al. (2008)      |
| MD03-2611       | -36.7        | 136.7         | -2420     | UK'37             | Calvo et al. (2007)       |
| MD97-2121       | -40.4        | 178.0         | -3014     | UK'37             | Pahnke and Sachs (2006)   |
| ODP 1233        | -41.0        | -74.5         | -838      | UK'37             | Lamy et al. (2007)        |
| TN057-21-PC2    | -41.1        | 7.8           | -4981     | UK'37             | Sachs et al. (2001)       |
| TN057-21        | -41.1        | 7.8           | -4981     | Mg/Ca             | Barker et al. (2009)      |
| SO136-GC11      | -43.5        | 167.9         | -1556     | UK'37             | Barrows et al. (2007)     |
| MD97-2120       | -45.5        | 174.9         | -1210     | UK'37             | Pahnke and Sachs (2006)   |
| Section MS2008E | 34.90        | 113.30        | 200       | MBT/CBT           | Peterse et al. (2011)     |
| Lake Tanganyika | -6.70        | 29.60         | 773       | TEX86             | Tierney et al. (2008)     |



**Table S3.** Cave records providing information for the LGM and MH but lacking information from modern speleothems about present day conditions. These sites are not used for subsequent analyses.

| Site                         | Latitude (°) | Longitude (°)  | Sample Id     | Data type                                                         | References                                                          |
|------------------------------|--------------|----------------|---------------|-------------------------------------------------------------------|---------------------------------------------------------------------|
| Lynds Cave                   | -41.97       | 146.42         | LYN           | $\delta^{18}\text{O}$ , $\delta^{13}\text{C}$ , growth rate       | Xia et al. (2001)                                                   |
| Hollywood Cave               | -41.95       | 171.41         | HW3           | $\delta^{18}\text{O}$                                             | Whittaker et al. (2011)                                             |
| Jintanwan Cave               | 29.48        | 109.53         | J1            | $\delta^{18}\text{O}$ , $\delta^{13}\text{C}$                     | Cosford et al. (2010)                                               |
| Xianshui Caves,<br>Yaoba Don | 21.25; 28.8  | 110.92; 109.83 | X3, YB1       | $\delta^{18}\text{O}$                                             | Cosford et al. (2008)                                               |
| Hulu Cave                    | 32.50        | 119.17         |               | $\Delta^{18}\text{O}$                                             | Wang et al. (2001);<br>Yuan et al. (2004);<br>Southon et al. (2012) |
| Okshola Cave                 | 67.00        | 15.00          | Oks82         | $\delta^{18}\text{O}$ , $\delta^{13}\text{C}$                     | Linge et al. (2009)                                                 |
| B7 Cave                      | 51.37        | 7.67           | B7-1, 5       | $\delta^{18}\text{O}$ , $\delta^{13}\text{C}$ , fabric            | Niggemann et al. (2003)                                             |
| V11 Cave                     | 46.60        | 22.70          |               | $\delta^{18}\text{O}$ , $\delta^{13}\text{C}$                     | Tămaş et al. (2005)                                                 |
| Milchbach Cave               | 46.62        | 8.08           | MB-2, 3, 5, 6 | $\delta^{18}\text{O}$ , $\delta^{13}\text{C}$ , fabric            | Luetscher et al. (2011)                                             |
| Villars                      | 45.43        | 0.77           | vil-stm 11    | $\delta^{13}\text{C}$                                             | Genty et al. (2006)                                                 |
| Chau                         | 44.23        | 4.26           | Chau-stm6     | $\delta^{13}\text{C}$                                             | Genty et al. (2006)                                                 |
| Buca della Renella           | 44.00        | 10.00          | RL4           | $\delta^{18}\text{O}$                                             | Drysdale et al. (2006)                                              |
| Pindal Cave                  | 43.38        | -4.50          | CAN           | $\delta^{18}\text{O}$ , $\delta^{13}\text{C}$ , trace<br>elements | Moreno et al. (2010)                                                |
| Ursilor Cave                 | 46.55        | 22.57          | PU-2          | $\delta^{18}\text{O}$ , $\delta^{13}\text{C}$                     | Onac et al. (2002)                                                  |
| Antro del Corchia            | 43.98        | 10.22          | CC26          | $\delta^{18}\text{O}$ , $\delta^{13}\text{C}$                     | Zanchetta et al. (2007)                                             |
| Jeita Cave                   | 32.93        | 35.63          | JeG-stm-1     | $\delta^{18}\text{O}$ , $\delta^{13}\text{C}$ , growth rate       | Verheyden et al. (2008)                                             |
| Soreq Cave                   | 32.58        | 35.03          |               | $\delta^{18}\text{O}$ , $\delta^{13}\text{C}$                     | Bar-Matthews and Ayalon<br>(2010)                                   |
| Tzavoa                       | 31.25        | 35.20          | TZ-14         | $\delta^{18}\text{O}$                                             | Vaks et al. (2006)                                                  |
| Jerusalem West Cave          | 31.78        | 35.15          | AF12          | $\delta^{18}\text{O}$                                             | Frumkin et al. (1999)                                               |
| Moomi Cave                   | 12.50        | 54.00          | M1-5          | $\delta^{18}\text{O}$                                             | Shakun et al. (2007)                                                |
| McFail's Cave                | 38.37        | -90.65         | MF1           | $\delta^{18}\text{O}$ , $\delta^{13}\text{C}$                     | van Beynen et al. (2004)                                            |
| Fort Stanton Cave            | 33.30        | -105.30        | FS2           | $\delta^{18}\text{O}$                                             | Asmeron et al. (2010)                                               |
| Cave of the Bells            | 31.75        | -109.25        |               | $\delta^{18}\text{O}$                                             | Wagner et al. (2010)                                                |
| Cueva del Diablo             | 18.18        | -99.92         | CBD-2         | $\delta^{18}\text{O}$                                             | Bernal et al. (2011)                                                |
| Venado Cave                  | 10,60        | -84.80         | V1            | $\delta^{18}\text{O}$ , $\delta^{13}\text{C}$                     | Lachniet et al. (2004)                                              |
| Lapa Grande                  | -13.58       | -43.63         | LG3, LG11     | $\delta^{18}\text{O}$                                             | Strikis et al. (2011)                                               |
| Pacupahuain Cave             | -11.24       | -75.82         | p09-PH2       | $\delta^{18}\text{O}$                                             | Kanner et al. (2012)                                                |
| La Mine Cave                 | 35.00        | 9.50           | Min-stm 1     | $\delta^{13}\text{C}$                                             | Genty et al. (2006)                                                 |

**Table S4.** Cave records providing information on relative and/or absolute changes in precipitation and/or temperature at 21000 yr BP (21k) and/or at 6000 yr BP (6k). Data type is indicated by a numerical code, where 1 is  $\delta^{18}\text{O}$ , 2 is  $\delta^{13}\text{C}$ , 3 is growth rate, 4 is trace elements, 5 is fabrics, 6 is fluid inclusions, 7 is clumped isotopes, 8 is grey scale and 9 is calibration against other records. Length of record (ka) indicates the length of the record covering our periods of interest (21000 yr BP, 6000 yr BP) to the present-day or to a present hiatus.

| Cave                                | Lat (°)      | Long (°)       | Sample Id                         | Data type | Length of record (ka) | No of dates 22-20ka | No of dates 6.5-5.5ka | Sample resoln (yrs) | T 6k (°C)   | T 21k (°C) | P 6k (mm) | P 21k (mm) | T 6k Warm/Cold         | T 21k Warm/Cold | P 6k Wet/Dry | P 21k Wet/Dry | References                                                    |
|-------------------------------------|--------------|----------------|-----------------------------------|-----------|-----------------------|---------------------|-----------------------|---------------------|-------------|------------|-----------|------------|------------------------|-----------------|--------------|---------------|---------------------------------------------------------------|
| Liang Luar Cave                     | -8.53        | 120.43         | LR06-B1, B3                       | 1,4,6     | 12.7                  | 0                   | 6                     | ~8                  | -0.2 +/-1.5 |            |           |            | No signif change       |                 | Dry          |               | Griffiths et al. (2009); Griffiths et al. (2010a,b)           |
| Nettlebed Cave                      | -41.08       | 172.67         | MD3                               | 1         | 31                    | 1                   | 0                     | ~150                |             |            |           |            | Warm                   | Cold            | Dry          | Dry           | Hellstrom et al. (1998)                                       |
| Babylon, Twin Forks, Wezpetti Caves | -41.31       | 171.9          | BN1.2; TF2; WP1; WN4;             | 1,2       | 23.4                  | 1                   | 2                     | ~41                 |             |            |           |            | No signif change       | Cold            | No change    | Dry           | Williams et al. (2005)                                        |
| Gardners Gut                        | -38.25       | 175.10         | GG1,2; RK-1                       | 1,2       | 11.8                  | 0                   | 1                     | 60-160              |             |            |           |            | No signif change       |                 | Dry          |               | Williams et al. (2004)                                        |
| Yudnamutana Cave                    | -30.19       | 139.42         | Yudnamutana                       | 1,2       | 11.6-5.2              | 0                   | 3                     | ~32                 |             |            |           |            |                        |                 | Wet          |               | Quigley et al. (2010)                                         |
| Gunung Buda                         | 4.00         | 114.00         | BA04, SCH02, SSC01                | 1         | 33                    | 2                   | 1                     | 56-72               |             |            |           |            | No signif change       | Cold            | Wet          | Dry           | Partin et al. (2007)                                          |
| Heshang, Dongge Caves               | 30.45; 25.00 | 110.42; 109.00 | HS-4, DA                          | 1,9       | 9.4                   | 0                   | 10                    | ~16                 |             |            | 100       |            |                        |                 | Wet          |               | Hu et al. (2008)                                              |
| Dongge Cave                         | 25.00        | 109.00         | D3,4; DA                          | 1         | 16                    | 0                   | 12                    | ~5-20               |             |            |           |            |                        |                 | Wet          |               | Yuan et al. (2004); Dykoski et al. (2005); Wang et al. (2005) |
| Lianhua Cave                        | 29.48        | 109.53         | A1                                | 1,2,4     | 6.6                   | 0                   | 1                     | ~8                  |             |            |           |            |                        |                 | Wet          |               | Cosford et al. (2008); Cosford et al. (2009)                  |
| Sanbao Cave                         | 31.67        | 110.43         | Multiple                          | 1         | 18                    | 0                   | 6                     | <40-70              |             |            |           |            |                        |                 | Wet          | Dry           | Wang et al. 2008; Dong et al. (2010)                          |
| Jiuxian Cave                        | 33.57        | 109.10         | C966-1, 2                         | 1         | 19                    | 0                   | 2                     | 4-112               |             |            |           |            |                        |                 | Wet          |               | Cai et al. (2010)                                             |
| Kesang Cave                         | 42.87        | 81.75          | KS08-1-H, 2-H; KS06-A-H-A, -A-H-B | 1         | 23                    | 1                   | 0                     |                     |             |            |           |            |                        |                 | Wet          | Dry           | Cheng et al. (2012)                                           |
| Soyle-grotta                        | 66.33        | 13.55          | SG93                              | 1,9       | 10                    | 0                   | ~20                   |                     | 0.6 +/- 1.8 |            |           |            | No signif change       |                 |              |               | Lauritzen and Lundbeg (1999)                                  |
| Okshola Cave                        | 67.00        | 15.00          | FM3                               | 1,2       | 7.2                   | 0                   | 3                     | ~29                 |             |            |           |            | No signif change       |                 | No change    |               | Linge et al. (2009)                                           |
| Crag Cave                           | 52.25        | 9.43           | CC3                               | 1         | 10.1                  | 0                   | 1                     | ~6                  |             |            |           |            | No signif change       |                 | No change    |               | McDermott et al. (2001)                                       |
| B7 Cave                             | 51.37        | 7.67           | B7-7                              | 1,2,5     | 17.6                  | 0                   | 1                     |                     |             |            |           |            |                        |                 | Dry          |               | Niggemann et al. (2003)                                       |
| Hölloch Cave                        | 46.97        | 8.78           | HÖL-1                             | 1,2       | 14.2                  | 0                   | 0                     |                     |             |            |           |            | No signif change/C old |                 |              |               | Wurth et al. (2004)                                           |
| Poleva                              | 48.00        | 30.00          | PP9,10                            | 1         | ~60-0                 | 0                   | 2                     |                     |             |            |           |            | Warm                   |                 |              |               | Constantin et al. (2007)                                      |
| Spannagel Cave                      | 47.05        | 11.40          | COMNISPA                          | 1         | 9                     | 0                   | 4                     |                     |             |            |           |            | No signif change       |                 |              |               | Vollweiler et al. (2006)                                      |
| Grotta Savi                         | 45.62        | 13.89          | SV1                               | 1         | 17                    | 0                   | 1                     | 18-125              |             |            |           |            | Cold                   |                 |              |               | Frisia et al. (2005)                                          |
| Grotta di Ernesto                   | 45.98        | 11.66          | ER76                              | 1,2, 3,5  | 8                     | 0                   | 1                     | ~50                 |             |            |           |            | No signif change       |                 |              |               | McDermott et al. (1999); Scholz et al. (2012)                 |
| Grotto de Clamouse                  | 42.71        | 3.61           | CL26                              | 1,5       | 11                    | 0                   | 1                     | ~40                 |             |            |           |            | Warm                   |                 |              |               | McDermott et al. (1999)                                       |
| Cova da Arcoia                      | 42.61        | 7.09           | ESP-03                            | 1,2,5     | 9.3                   | 0                   | 0                     |                     |             |            |           |            |                        |                 | Dry          |               | Railsback et al. (2011)                                       |

|                               |        |         |            |       |      |   |   |        |            |  |         |  |                  |      |      |               |     |                                                                            |
|-------------------------------|--------|---------|------------|-------|------|---|---|--------|------------|--|---------|--|------------------|------|------|---------------|-----|----------------------------------------------------------------------------|
| Soreq Cave                    | 32.58  | 35.03   | 12-Z-B     | 7     |      |   |   |        |            |  |         |  |                  |      | Cold |               |     | Affek et al. (2008)                                                        |
| Soreq Cave                    | 32.58  | 35.03   | 12-Z-C     | 1,6   |      |   |   |        |            |  |         |  |                  |      | Cold |               |     | McGarry et al. (2004)                                                      |
| Peqin Cave + comp. Soreq Cave | 32.97  | 35.33   | Multi      | 1,2   | 250  | 0 | 1 |        |            |  |         |  |                  |      |      | Wet           |     | Bar-Matthews et al. (2003)                                                 |
| Sofular Cave                  | 41.42  | 31.93   | So-1, So-2 | 1,2   | 50   | 2 | 2 | 5-50   |            |  |         |  |                  |      | Cold | Wet/Dry       | Dry | Fleitmann et al. (2009a); Göktürk et al. (2011)                            |
| Soreq Cave                    | 32.58  | 35.03   | Multi      | 1,2,4 | 60   | 3 | 1 |        |            |  |         |  |                  | Warm | Cold | Wet           | Dry | Bar-Matthews et al. (1999); Kaufman et al. (1998)                          |
| Hoti Cave                     | 23.08  | 57.35   | H12        | 1     | 6.3  |   | 6 | 1.5-10 |            |  |         |  |                  |      |      | Wet           |     | Fleitmann et al. (2003); Fleitmann et al. (2007); Fleitmann et al. (2009b) |
| Qunf Cave                     | 17.17  | 54.30   | Q5         | 1     | 10.6 |   | 2 | 1.5-10 |            |  |         |  |                  |      |      | Wet           |     | Fleitmann et al. (2007); Fleitmann et al. (2009b)                          |
| Cold Water Cave               | 43.47  | -91.97  | CWCIS      | 1,2   | 7.8  |   |   |        |            |  |         |  |                  |      |      | Wet           |     | Denniston et al. (1999)                                                    |
| Spring Valley, Mystery Cave   | 43.53  | -92.52  | SV1, MC28  | 1,2   | 8.5  |   |   |        |            |  |         |  |                  |      |      | No change/Dry |     | Denniston et al. (1999)                                                    |
| Buckeye Creek Cave            | 37.98  | -79.59  | BCC-2, 4,6 | 1,4   | 7.8  |   |   | ~60    |            |  |         |  |                  |      |      | Wet           |     | Springer et al. (2008); Hardt et al. (2010)                                |
| Pink Panther Cave             | 32.,8  | -104.83 | PP1        | 1     | 12.3 |   | 2 | ~17    |            |  |         |  |                  |      |      | Wet           |     | Asmeron et al. (2007)                                                      |
| Cueva del Tigre Perdido       | -4.06  | -76.69  | NC-B       | 1, 6  | 13.3 |   | 2 |        | -0.5+/-1.5 |  | 75+/-25 |  | No signif change |      |      | Wet           |     | van Breukelen et al. (2008)                                                |
| Boutverá Cave                 | -26.78 | -48.84  | Bt2        | 1,4   | 116  |   |   |        |            |  |         |  |                  |      |      | Dry           | Wet | Cruz et al. (2007); Cruz et al. (2005); Wang et al. (2007)                 |
| Cold Air Cave                 | -23.98 | 29.18   | T7, T8     | 1,2,8 | 24.4 | 1 | 2 | 6-500  |            |  |         |  |                  | Warm | Cold | Wet           | Dry | Lee-Thorp et al. (2001); Holmgren et al. (2003)                            |
| Cango Cave                    | -33.38 | 22.22   | V3         | 1,2   | 50   | 1 | 0 |        |            |  |         |  |                  |      | Cold |               |     | Talma and Vogel (1992)                                                     |

**Table S5.** The boundary conditions used for the PMIP 2 and CMIP5 paleo-experiments. Boundary conditions that are different between different sets of simulations are highlighted in yellow; blue highlighting shows boundary conditions not included in the PMIP2 experiments (see PMIP website for more details of the protocols: <http://pmip3.lsce.ipsl.fr/>).

|                             |                                      | <b>PMIP2</b>                                                                                                                                                     | <b>CMIP5/PMIP3</b>                                                                                                                                                    |
|-----------------------------|--------------------------------------|------------------------------------------------------------------------------------------------------------------------------------------------------------------|-----------------------------------------------------------------------------------------------------------------------------------------------------------------------|
| <b>Mid Holocene</b>         | Insolation                           | <b>eccentricity</b> = 0.018682<br><b>obliquity</b> = 24.105°<br><b>perihelion-180°</b> = 0.87°                                                                   | <b>eccentricity</b> = 0.018682<br><b>obliquity</b> = 24.105°<br><b>perihelion-180°</b> = 0.87°                                                                        |
|                             | Solar constant                       | As in PI simulation                                                                                                                                              | As in PI simulation                                                                                                                                                   |
|                             | Trace gases                          | <b>CO<sub>2</sub></b> = 280 ppm<br><b>CH<sub>4</sub></b> = 650 ppb<br><b>N<sub>2</sub>O</b> = 270 ppb<br><b>CFC</b> = 0<br><b>O<sub>3</sub></b> = not considered | <b>CO<sub>2</sub></b> = 280 ppm<br><b>CH<sub>4</sub></b> = 650 ppb<br><b>N<sub>2</sub>O</b> = 270 ppb<br><b>CFC</b> = 0<br><b>O<sub>3</sub></b> = same as in CMIP5 PI |
|                             | Aerosols                             | As in PI simulation                                                                                                                                              | As in PI simulation                                                                                                                                                   |
|                             | Ice sheets and land-sea distribution | As in PI simulation                                                                                                                                              | As in PI simulation                                                                                                                                                   |
|                             | Land-sea mask                        | As in PI simulation                                                                                                                                              | As in PI simulation                                                                                                                                                   |
|                             | Vegetation and land surface          | Either prescribed modern vegetation or computed using a dynamic vegetation module                                                                                | Computed or prescribed as in PI, with phenology computed for models with active carbon cycle or prescribed from data                                                  |
|                             | Carbon cycle                         | Not considered                                                                                                                                                   | Either not considered or interactive, with atmospheric concentration prescribed and ocean and land carbon fluxes diagnosed as recommended in CMIP5                    |
| <b>Last Glacial Maximum</b> | Insolation                           | <b>eccentricity</b> = 0.018994<br><b>obliquity</b> = 22.949°<br><b>perihelion-180°</b> = 114.42°                                                                 | <b>eccentricity</b> = 0.018994<br><b>obliquity</b> = 22.949°<br><b>perihelion-180°</b> = 114.42°                                                                      |
|                             | Solar constant                       | As in PI simulation                                                                                                                                              | As in PI simulation                                                                                                                                                   |
|                             | Trace gases                          | <b>CO<sub>2</sub></b> = 185 ppm<br><b>CH<sub>4</sub></b> = 350 ppb<br><b>N<sub>2</sub>O</b> = 200 ppb<br><b>CFC</b> = 0<br><b>O<sub>3</sub></b> = same as in PI  | <b>CO<sub>2</sub></b> = 185 ppm<br><b>CH<sub>4</sub></b> = 350 ppb<br><b>N<sub>2</sub>O</b> = 200 ppb<br><b>CFC</b> = 0<br><b>O<sub>3</sub></b> = same as in PI       |
|                             | Aerosols                             | As in PI simulation                                                                                                                                              | As in PI simulation                                                                                                                                                   |
|                             | Ice sheet                            | Peltier et al. (2004)                                                                                                                                            | Blended ice sheet (Braconnot et al. 2012)                                                                                                                             |
|                             | Land-sea mask                        | Prescribed following Peltier et al. (2004) land-sea mask                                                                                                         | Prescribed from blended ice-sheet land-sea mask                                                                                                                       |
|                             | Freshwater                           | Excess freshwater added to ocean in 3 different regions                                                                                                          | Excess freshwater added to ocean in 3 different regions                                                                                                               |
|                             | River runoff                         | As in PI or river pathway modified (no formal protocol)                                                                                                          | As in PI or river pathway modifier according to PMIP protocol                                                                                                         |
|                             | Mean ocean salinity                  | Not considered                                                                                                                                                   | +1 PSU everywhere                                                                                                                                                     |
|                             | Carbon cycle                         | Not considered                                                                                                                                                   | Interactive, with atmospheric concentration prescribed and ocean and land carbon fluxes diagnosed following CMIP5 recommendations                                     |

**Table S6.** Details of the models and paleo-simulations from the PMIP2 and CMIP5 archives. The model attributes given here are derived from the archived netcdf files, but these are not always complete or accurate, and thus there may be some inconsistencies or missing information about specific models. Abbreviated codes used to refer to specific models in the text and in other tables are given here.

| Archive | Model name            | Code            | Type | Resolution (number of gridcells: latitude, longitude) |          |          | Year length | Simulations |     | Reference                                                                  |
|---------|-----------------------|-----------------|------|-------------------------------------------------------|----------|----------|-------------|-------------|-----|----------------------------------------------------------------------------|
|         |                       |                 |      | Atmosphere                                            | Ocean    | Sea Ice  |             | MH          | LGM |                                                                            |
| PMIP2   | CCSM                  | CCSM            | OA   | 64, 128                                               | 395, 320 | 395, 320 | 365         | X           | X   | Otto-Bliesner et al. (2006)                                                |
| PMIP2   | CNRM-CM33             | CNRM3.3         | OA   | 64, 128                                               | 170, 180 | 170, 180 | 365         |             | X   | Royer (2008); Johns et al. (2011)                                          |
| PMIP2   | CSIRO-Mk3L-1.0        | CSIRO3.1.0      | OA   | 56, 64                                                | 56, 64   | 56, 64   | 365         | X           |     | Phipps (2006)                                                              |
| PMIP2   | CSIRO-Mk3L-1.1        | CSIRO3.1.1      | OA   | 56, 64                                                | 112, 128 | 56, 64   | 365         | X           |     | Phipps (2006)                                                              |
| PMIP2   | ECBILTCLIO            | ECBILT          | OA   | 32, 64                                                | 72, 144  | 72, 144  | 360         |             | X   | de Vries and Weber (2005)                                                  |
| PMIP2   | ECBILTCLIOVECODE      | ECBILT.LV       | OA   | 32, 64                                                | 60, 120  | 60, 120  | 360         | X           |     | Renssen et al. (2005)                                                      |
| PMIP2   | ECHAM5-MPIOM1         | ECHAM           | OA   | 48, 96                                                | 180, 360 | 48, 96   | 365-366     | X           |     | Jungclaus et al. (2006)                                                    |
| PMIP2   | FGOALS-1.0g           | FGOALS1         | OA   | 60, 128                                               | 170, 360 | 170, 360 | 365         | X           | X   | Yu et al. (2002); Yu et al. (2004)                                         |
| PMIP2   | FOAM                  | FOAM            | OA   | 40, 40                                                | 128, 128 | 128, 128 | 360         | X           |     | Jacob et al. (2001)                                                        |
| PMIP2   | GISSmodelE            | GISS.E          | OA   | 46, 72                                                | 46, 72   | 46, 72   | 365         | X           |     | Schmidt et al. (2006)                                                      |
| PMIP2   | HadCM3M2              | HadCM3          | OA   | 73, 96                                                | 144, 288 | 144, 288 | 360         |             | X   | Gordon et al. (2000)                                                       |
| PMIP2   | IPSL-CM4-V1-MR        | IPSL4           | OA   | 72, 96                                                | 170, 180 | 170, 180 | 360         | X           | X   | Marti et al. (2005)                                                        |
| PMIP2   | MIROC3.2              | MIROC           | OA   | 64, 128                                               | 192, 256 | 192, 256 | 360         | X           | X   | K-1-Model-Developers (2004)                                                |
| PMIP2   | MRI-CGCM2.3.4fa       | MRI2fa          | OA   | 64, 128                                               | 111, 144 | 111, 144 | 365         | X           |     | Yukimoto et al. (2006)                                                     |
| PMIP2   | MRI-CGCM2.3.4nfa      | MRI2            | OA   | 64, 128                                               | 111, 144 | 111, 144 | 365         | X           |     | Yukimoto et al. (2006)                                                     |
| PMIP2   | UBRIS-HadCM3M2        | HadCM3          | OA   | 73, 96                                                | 144, 288 | 144, 288 | 360         | X           |     | Gordon et al. (2000)                                                       |
| PMIP2   | ECBILTCLIOVECODE      | ECBILT.LV (OAV) | OAV  | 32, 64                                                | 60, 120  | 60, 120  | 360         | X           |     | Renssen et al. (2005)                                                      |
| PMIP2   | ECHAM53-MPIOM127-LPJ  | ECHAM (OAV)     | OAV  | 48, 96                                                | 180, 360 | 180, 360 | 365-366     |             | X   | Roeckner et al. (2003); Marsland et al. (2003); Mikolajewicz et al. (2007) |
| PMIP2   | FOAM                  | FOAM (OAV)      | OAV  | 40, 40                                                | 128, 128 | 128, 128 | 360         | X           |     | Notaro et al. (2005)                                                       |
| PMIP2   | HadCM3M2              | HadCM3 (OAV)    | OAV  | 73, 96                                                | 144, 288 | 144, 288 | 360         |             | X   | Gordon et al. (2000); Essery et al. (2003)                                 |
| PMIP2   | MRI-CGCM2.3.4fa       | MRI2fa (OAV)    | OAV  | 64, 128                                               | 111, 144 | 111, 144 | 365         | X           |     | Yukimoto et al. (2006)                                                     |
| PMIP2   | MRI-CGCM2.3.4nfa      | MRI2 (OAV)      | OAV  | 64, 128                                               | 111, 144 | 111, 144 | 365         | X           |     | Yukimoto et al. (2006)                                                     |
| PMIP2   | UBRIS-HadCM3M2        | HadCM3 (OAV)    | OAV  | 73, 96                                                | 144, 288 | 144, 288 | 360         | X           |     | Gordon et al. (2000)                                                       |
| CMIP5   | CCSM4                 | CCSM4           | OA   | 192, 288                                              | 320,384  | 320,384  | 365         | X           | X   | Gent et al. (2011)                                                         |
| CMIP5   | CNRM-CM5              | CNRM5           | OA   | 128, 256                                              | 292, 362 | 292, 362 | 365-366     | X           |     | Voldoire et al. (2012)                                                     |
| CMIP5   | CSIRO-Mk3-6-0         | CSIRO3.6        | OA   | 96, 192                                               | 189, 192 | 96, 192  | 365         | X           |     | Rotstayn et al. (2010)                                                     |
| CMIP5   | CSIRO-Mk3L-1-2 (UNSW) | CSIRO3.1.2      | OA   | 56, 64                                                | 128, 225 | 56, 64   | 365         | X           |     | Phipps et al. (2011); Wu et al. (2008)                                     |
| CMIP5   | EC-EARTH (KNMI)       | EARTH           | OA   | 160, 320                                              | 362, 292 | 362, 292 | 365-366     | X           |     | Hazeleger et al. (2012)                                                    |
| CMIP5   | FGOALS-s2 (LASG/IAP)  | FGOALS2         | OA   | 108, 128                                              | 196, 360 | 196, 360 | 365         | X           |     | No publication                                                             |
| CMIP5   | FGOALS-g2 (LASG/IAP)  | FGOALSG2        | OA   | 60, 128                                               | 196, 360 | 196, 360 | 365         | X           |     | No publication                                                             |
| CMIP5   | GISS-E2-R             | GISS.E2         | OA   | 90, 144                                               | 90, 144  | 90, 144  | 365         | X           | X   | No publication                                                             |
| CMIP5   | MPI-ESM-P             | MPI (ESM)       | OA   | 96, 192                                               | 220, 256 | 220, 256 | 365-366     | X           | X   | No publication                                                             |
| CMIP5   | MRI-CGCM3             | MRI3            | OA   | 160, 320                                              | 360, 368 | 360, 368 | 365         | X           |     | Yukimoto et al. (2011)                                                     |
| CMIP5   | BCC-CSM1-1            | BCC             | OAC  | 64, 128                                               | 232, 360 | 232, 360 | 365         | X           |     | Wu et al. (2010); Marti et al. (2010)                                      |
| CMIP5   | COSMOS-ASO            | COSMOS          | OAC  | 96, 48                                                | 120, 101 | 120, 101 | 360         |             | X   | Budich et al. (2010)                                                       |
| CMIP5   | IPSL-CM5A-LR          | IPSL5           | OAC  | 96, 96                                                | 149, 182 | 149, 182 | 365         | X           | X   | Watanabe et al. (2011)                                                     |
| CMIP5   | MIROC-ESM             | MIROC (ESM)     | OAC  | 64, 128                                               | 192, 256 | 192, 256 | 365         | X           | X   | Collins et al. (2011)                                                      |
| CMIP5   | HadGEM2-CC            | HadGEM2 (CC)    | OAC  | 145, 192                                              | 216, 360 | 216, 360 | 360         | X           |     | Martin et al. (2011); Jones et al. (2011)                                  |
| CMIP5   | HadGEM2-ES            | HadGEM2 (ESM)   | OAC  | 145, 192                                              | 216, 360 | 216, 360 | 360         | X           |     | Martin et al. (2011); Jones et al. (2011)                                  |

**Table S7.** Ensemble values of global metrics for the Last Glacial Maximum (LGM) simulations. The ensembles are all of the models (ALL), all of the PMIP2 models (PMIP2), all of the CMIP5 models (CMIP5), all of the PMIP2 ocean-atmosphere models (PMIP2 OA), all of the PMIP2 ocean-atmosphere-vegetation models (PMIP2 OAV), all of the CMIP5 ocean-atmosphere models (CMIP5 OA) and all of the CMIP5 ocean-atmosphere-carbon cycle models (CMIP5 OAC).

| Variable | Metric         | All    |        | PMIP2  |        | CMIP5  |        | PMIP2OA |        | PMIP2OAV |        | CMIP5OA |        | CMIP5OAC |        |
|----------|----------------|--------|--------|--------|--------|--------|--------|---------|--------|----------|--------|---------|--------|----------|--------|
|          |                | mean   | median | mean   | median | mean   | median | mean    | median | mean     | median | mean    | median | mean     | median |
| SSTann   | Median Bias    | -0.37  | -0.32  | -0.37  | -0.38  | -0.34  | -0.28  | -0.19   | -0.16  | -0.91    | -0.91  | -0.19   | -0.21  | -0.68    | -0.68  |
|          | IQR Ratio      | 0.27   | 0.29   | 0.36   | 0.38   | 0.23   | 0.27   | 0.33    | 0.37   | 0.29     | 0.29   | 0.18    | 0.23   | 0.53     | 0.53   |
|          | 1- $\tau$      | 0.68   | 0.72   | 0.68   | 0.70   | 0.77   | 0.82   | 0.68    | 0.72   | 0.77     | 0.77   | 0.79    | 0.85   | 0.78     | 0.78   |
|          | Fuzzy Distance | 1.20   | 1.19   | 1.18   | 1.20   | 1.26   | 1.23   | 1.16    | 1.18   | 1.42     | 1.42   | 1.21    | 1.22   | 1.35     | 1.19   |
| SSTsum   | Median Bias    | -0.44  | -0.35  | -0.51  | -0.38  | -0.38  | -0.36  | -0.34   | -0.13  | -0.93    | -0.93  | -0.28   | -0.32  | -0.58    | -0.58  |
|          | IQR Ratio      | 0.32   | 0.29   | 0.39   | 0.38   | 0.27   | 0.29   | 0.39    | 0.32   | 0.35     | 0.35   | 0.27    | 0.26   | 0.52     | 0.52   |
|          | 1- $\tau$      | 0.97   | 0.97   | 0.96   | 0.96   | 0.99   | 0.99   | 0.96    | 0.97   | 0.97     | 0.97   | 1.00    | 1.01   | 0.99     | 0.99   |
|          | Fuzzy Distance | 1.46   | 1.44   | 1.52   | 1.51   | 1.43   | 1.45   | 1.50    | 1.43   | 1.63     | 1.63   | 1.41    | 1.45   | 1.55     | 1.55   |
| SSTwin   | Median Bias    | -0.40  | -0.23  | -0.40  | -0.32  | -0.28  | -0.20  | -0.20   | -0.07  | -0.80    | -0.80  | -0.15   | -0.15  | -0.48    | -0.48  |
|          | IQR Ratio      | 0.31   | 0.28   | 0.38   | 0.39   | 0.27   | 0.30   | 0.39    | 0.35   | 0.40     | 0.40   | 0.24    | 0.29   | 0.45     | 0.45   |
|          | 1- $\tau$      | 0.98   | 0.98   | 0.98   | 0.98   | 0.99   | 1.00   | 0.98    | 1.00   | 0.97     | 0.97   | 0.99    | 0.99   | 0.98     | 0.98   |
|          | Fuzzy Distance | 1.34   | 1.31   | 1.37   | 1.31   | 1.32   | 1.35   | 1.37    | 1.33   | 1.44     | 1.44   | 1.31    | 1.35   | 1.42     | 1.42   |
| SInmon   | Median Bias    | 1.52   | -0.69  | 2.07   | 0.82   | 0.60   | -0.69  | 2.15    | 0.82   | 0.82     | 0.12   | -0.69   | -0.69  | -0.69    | -0.69  |
|          | IQR Ratio      | 1.10   | 1.27   | 1.21   | 1.48   | 1.15   | 0.84   | 1.06    | 1.27   | 1.69     | 1.69   | 1.14    | 0.63   | 1.06     | 1.06   |
|          | 1- $\tau$      | 0.73   | 0.84   | 0.74   | 0.76   | 0.75   | 0.84   | 0.71    | 0.72   | 0.77     | 0.77   | 0.78    | 0.94   | 0.75     | 0.75   |
|          | Fuzzy Distance | 0.97   | 1.02   | 1.17   | 1.10   | 0.83   | 1.00   | 1.33    | 0.98   | 0.95     | 0.95   | 0.70    | 1.00   | 1.05     | 1.05   |
| MAT      | Median Bias    | 0.83   | 1.12   | 1.06   | 1.26   | 0.93   | 1.19   | 1.45    | 1.52   | 0.15     | 0.15   | 1.68    | 1.83   | 0.12     | 0.43   |
|          | IQR Ratio      | 0.74   | 0.67   | 0.64   | 0.66   | 0.84   | 0.66   | 0.59    | 0.61   | 0.92     | 0.92   | 0.75    | 0.61   | 0.56     | 0.45   |
|          | 1- $\tau$      | 0.69   | 0.67   | 0.70   | 0.68   | 0.68   | 0.67   | 0.66    | 0.66   | 0.78     | 0.78   | 0.71    | 0.68   | 0.66     | 0.67   |
|          | Fuzzy Distance | 2.35   | 2.44   | 2.40   | 2.49   | 2.58   | 2.55   | 2.58    | 2.50   | 3.25     | 3.25   | 2.80    | 2.75   | 2.52     | 2.24   |
| MTCO     | Median Bias    | 3.92   | 4.16   | 4.21   | 4.61   | 3.65   | 3.75   | 4.77    | 5.04   | 3.21     | 3.21   | 4.46    | 4.82   | 2.51     | 2.81   |
|          | IQR Ratio      | 0.69   | 0.74   | 0.57   | 0.63   | 0.79   | 0.78   | 0.56    | 0.58   | 0.58     | 0.58   | 0.75    | 0.77   | 0.54     | 0.45   |
|          | 1- $\tau$      | 0.68   | 0.69   | 0.69   | 0.70   | 0.67   | 0.67   | 0.66    | 0.63   | 0.76     | 0.76   | 0.69    | 0.69   | 0.62     | 0.62   |
|          | Fuzzy Distance | 4.16   | 4.30   | 4.42   | 4.42   | 4.17   | 4.20   | 4.27    | 3.90   | 4.69     | 4.69   | 4.71    | 4.45   | 3.70     | 4.35   |
| MTWA     | Median Bias    | -0.47  | -0.62  | -0.58  | -0.58  | -0.47  | -0.33  | -0.51   | -0.49  | -1.47    | -1.47  | 0.10    | 0.36   | -1.07    | -1.59  |
|          | IQR Ratio      | 0.43   | 0.48   | 0.54   | 0.52   | 0.28   | 0.43   | 0.57    | 0.52   | 0.57     | 0.57   | 0.36    | 0.35   | 0.50     | 0.52   |
|          | 1- $\tau$      | 0.69   | 0.72   | 0.70   | 0.75   | 0.74   | 0.70   | 0.71    | 0.73   | 0.72     | 0.72   | 0.85    | 0.83   | 0.71     | 0.73   |
|          | Fuzzy Distance | 2.81   | 2.95   | 2.77   | 3.07   | 2.53   | 2.65   | 2.77    | 2.81   | 3.69     | 3.69   | 3.32    | 3.05   | 3.12     | 3.04   |
| GDD5     | Median Bias    | -      | -      | -      | -      | -      | -      | -       | -      | -        | -      | -       | -      | -        | -      |
|          | IQR Ratio      | 282.19 | 301.42 | 259.56 | 271.06 | 283.12 | 308.10 | 197.04  | 259.31 | 416.01   | 416.01 | 178.11  | 245.74 | 510.64   | 481.68 |
|          | 1- $\tau$      | 0.48   | 0.55   | 0.49   | 0.52   | 0.51   | 0.62   | 0.47    | 0.50   | 0.58     | 0.58   | 0.45    | 0.59   | 0.70     | 0.77   |
|          | Fuzzy Distance | 0.62   | 0.61   | 0.61   | 0.56   | 0.63   | 0.64   | 0.61    | 0.57   | 0.64     | 0.64   | 0.61    | 0.62   | 0.66     | 0.66   |
| MAP      | Median Bias    | 349.25 | 390.89 | 333.48 | 392.09 | 379.51 | 383.58 | 311.58  | 387.40 | 437.89   | 437.89 | 394.25  | 394.03 | 521.62   | 546.02 |
|          | IQR Ratio      | 123.96 | 132.87 | 157.30 | 145.68 | 50.51  | 59.52  | 158.18  | 127.15 | 167.15   | 167.15 | 75.83   | 84.97  | 31.83    | 42.48  |
|          | 1- $\tau$      | 0.61   | 0.59   | 0.71   | 0.76   | 0.56   | 0.65   | 0.76    | 0.77   | 0.72     | 0.72   | 0.56    | 0.66   | 0.67     | 0.72   |
|          | Fuzzy Distance | 1.03   | 1.03   | 1.11   | 1.12   | 0.90   | 0.90   | 1.09    | 1.08   | 1.15     | 1.15   | 0.93    | 0.91   | 0.85     | 0.87   |
| $\alpha$ | Median Bias    | 196.73 | 189.32 | 184.02 | 200.34 | 187.72 | 177.07 | 177.52  | 192.38 | 225.30   | 225.30 | 169.64  | 167.67 | 207.86   | 199.11 |
|          | IQR Ratio      | 0.03   | 0.03   | 0.05   | 0.06   | 0.00   | 0.01   | 0.05    | 0.05   | 0.09     | 0.09   | 0.02    | 0.01   | -0.01    | 0.00   |
|          | 1- $\tau$      | 2.60   | 2.45   | 2.18   | 2.36   | 2.98   | 2.61   | 2.02    | 2.23   | 2.73     | 2.73   | 2.68    | 2.29   | 2.97     | 2.98   |
|          | Fuzzy Distance | 0.76   | 0.75   | 0.76   | 0.79   | 0.76   | 0.76   | 0.75    | 0.76   | 0.84     | 0.84   | 0.74    | 0.74   | 0.79     | 0.77   |
| $\alpha$ | Median Bias    | 0.11   | 0.11   | 0.10   | 0.11   | 0.11   | 0.11   | 0.09    | 0.10   | 0.13     | 0.13   | 0.11    | 0.10   | 0.13     | 0.11   |
|          | IQR Ratio      | 0.03   | 0.03   | 0.05   | 0.06   | 0.00   | 0.01   | 0.05    | 0.05   | 0.09     | 0.09   | 0.02    | 0.01   | -0.01    | 0.00   |
|          | 1- $\tau$      | 2.60   | 2.45   | 2.18   | 2.36   | 2.98   | 2.61   | 2.02    | 2.23   | 2.73     | 2.73   | 2.68    | 2.29   | 2.97     | 2.98   |
|          | Fuzzy Distance | 0.76   | 0.75   | 0.76   | 0.79   | 0.76   | 0.76   | 0.75    | 0.76   | 0.84     | 0.84   | 0.74    | 0.74   | 0.79     | 0.77   |

**Table S8.** Ensemble values of global metrics for the Mid-Holocene (MH) simulations. The ensembles are all of the models (ALL), all of the PMIP2 models (PMIP2), all of the CMIP5 models (CMIP5), all of the PMIP2 ocean-atmosphere models (PMIP2 OA), all of the PMIP2 ocean-atmosphere-vegetation models (PMIP2 OAV), all of the CMIP5 ocean-atmosphere models (CMIP5 OA) and all of the CMIP5 ocean-atmosphere-carbon cycle models (CMIP5 OAC).

| Variable | Metric         | All Models |        | PMIP2  |        | CMIP5  |        | PMIP2OA |        | PMIP2OAV |        | CMIP5OA |        | CMIP5OAC |        |
|----------|----------------|------------|--------|--------|--------|--------|--------|---------|--------|----------|--------|---------|--------|----------|--------|
|          |                | mean       | median | mean   | median | mean   | median | mean    | median | mean     | median | mean    | median | mean     | median |
| SSTann   | Median Bias    | -0.29      | -0.29  | -0.29  | -0.27  | -0.31  | -0.28  | -0.31   | -0.31  | -0.22    | -0.21  | -0.25   | -0.29  | -0.29    | -0.24  |
|          | IQR Ratio      | 0.33       | 0.28   | 0.34   | 0.31   | 0.28   | 0.28   | 0.34    | 0.34   | 0.20     | 0.20   | 0.32    | 0.33   | 0.32     | 0.40   |
|          | 1- $\tau$      | 0.90       | 0.89   | 0.90   | 0.91   | 0.91   | 0.91   | 0.95    | 0.95   | 0.88     | 0.84   | 0.89    | 0.89   | 0.90     | 0.94   |
|          | Fuzzy Distance | 0.48       | 0.49   | 0.51   | 0.50   | 0.45   | 0.48   | 0.50    | 0.50   | 0.44     | 0.44   | 0.49    | 0.53   | 0.49     | 0.50   |
| MAT      | Median Bias    | 0.12       | 0.12   | 0.22   | 0.18   | -0.02  | 0.01   | 0.14    | 0.12   | 0.27     | 0.27   | -0.02   | 0.00   | 0.09     | 0.10   |
|          | IQR Ratio      | 0.15       | 0.14   | 0.15   | 0.16   | 0.18   | 0.15   | 0.12    | 0.15   | 0.24     | 0.20   | 0.16    | 0.13   | 0.24     | 0.18   |
|          | 1- $\tau$      | 0.90       | 0.89   | 0.91   | 0.91   | 0.90   | 0.88   | 0.92    | 0.93   | 0.92     | 0.90   | 0.89    | 0.89   | 0.92     | 0.89   |
|          | Fuzzy Distance | 1.08       | 1.09   | 1.08   | 1.09   | 1.09   | 1.09   | 1.09    | 1.08   | 1.14     | 1.07   | 1.08    | 1.09   | 1.08     | 1.07   |
| MTCO     | Median Bias    | 0.02       | 0.04   | 0.05   | 0.05   | -0.07  | -0.05  | -0.06   | -0.05  | 0.18     | 0.19   | -0.06   | -0.05  | -0.07    | -0.09  |
|          | IQR Ratio      | 0.12       | 0.12   | 0.12   | 0.13   | 0.16   | 0.17   | 0.12    | 0.12   | 0.18     | 0.15   | 0.13    | 0.16   | 0.27     | 0.26   |
|          | 1- $\tau$      | 0.91       | 0.90   | 0.93   | 0.93   | 0.91   | 0.91   | 0.96    | 0.97   | 0.92     | 0.91   | 0.89    | 0.88   | 0.95     | 0.92   |
|          | Fuzzy Distance | 1.32       | 1.29   | 1.30   | 1.29   | 1.31   | 1.26   | 1.26    | 1.28   | 1.34     | 1.34   | 1.29    | 1.28   | 1.37     | 1.35   |
| MTWA     | Median Bias    | 1.33       | 1.30   | 1.43   | 1.39   | 1.20   | 1.18   | 1.39    | 1.34   | 1.47     | 1.40   | 1.19    | 1.19   | 1.21     | 1.14   |
|          | IQR Ratio      | 0.25       | 0.23   | 0.25   | 0.27   | 0.23   | 0.22   | 0.25    | 0.26   | 0.29     | 0.30   | 0.23    | 0.23   | 0.25     | 0.28   |
|          | 1- $\tau$      | 1.05       | 1.07   | 1.06   | 1.08   | 1.03   | 1.05   | 1.08    | 1.09   | 1.01     | 1.03   | 1.07    | 1.09   | 0.97     | 0.99   |
|          | Fuzzy Distance | 1.75       | 1.70   | 1.80   | 1.78   | 1.68   | 1.63   | 1.73    | 1.67   | 1.77     | 1.73   | 1.56    | 1.56   | 1.67     | 1.61   |
| GDD5     | Median Bias    | 27.36      | 22.95  | 38.67  | 31.51  | 10.12  | 7.36   | 27.77   | 20.41  | 57.15    | 44.59  | 2.21    | 2.43   | 18.11    | 19.70  |
|          | IQR Ratio      | 0.14       | 0.11   | 0.13   | 0.12   | 0.15   | 0.12   | 0.13    | 0.12   | 0.20     | 0.17   | 0.14    | 0.14   | 0.20     | 0.19   |
|          | 1- $\tau$      | 0.98       | 1.01   | 1.01   | 1.02   | 0.95   | 0.99   | 1.03    | 1.05   | 0.98     | 0.96   | 1.01    | 1.06   | 0.91     | 0.89   |
|          | Fuzzy Distance | 192.10     | 189.91 | 194.57 | 192.55 | 192.03 | 193.27 | 191.82  | 192.87 | 199.79   | 191.83 | 195.48  | 192.11 | 184.57   | 188.16 |
| MAP      | Median Bias    | -50.19     | -49.68 | -46.95 | -46.42 | -53.91 | -53.44 | -47.82  | -47.31 | -43.39   | -41.57 | -53.08  | -51.00 | -53.17   | -53.39 |
|          | IQR Ratio      | 0.13       | 0.13   | 0.15   | 0.14   | 0.14   | 0.15   | 0.15    | 0.14   | 0.17     | 0.14   | 0.14    | 0.16   | 0.22     | 0.20   |
|          | 1- $\tau$      | 0.87       | 0.87   | 0.91   | 0.91   | 0.85   | 0.86   | 0.93    | 0.93   | 0.87     | 0.86   | 0.85    | 0.84   | 0.87     | 0.93   |
|          | Fuzzy Distance | 85.41      | 85.90  | 85.28  | 83.45  | 86.83  | 88.76  | 86.84   | 84.99  | 82.78    | 80.55  | 87.98   | 85.16  | 89.05    | 91.47  |
| $\alpha$ | Median Bias    | -0.04      | -0.03  | -0.03  | -0.03  | -0.04  | -0.04  | -0.03   | -0.03  | -0.03    | -0.02  | -0.04   | -0.04  | -0.04    | -0.04  |
|          | IQR Ratio      | 0.57       | 0.57   | 0.53   | 0.51   | 0.64   | 0.67   | 0.57    | 0.57   | 0.54     | 0.49   | 0.63    | 0.64   | 0.73     | 0.70   |
|          | 1- $\tau$      | 0.93       | 0.94   | 0.95   | 0.96   | 0.91   | 0.92   | 0.96    | 0.96   | 0.93     | 0.90   | 0.90    | 0.89   | 0.95     | 0.99   |
|          | Fuzzy Distance | 0.05       | 0.05   | 0.05   | 0.05   | 0.05   | 0.05   | 0.05    | 0.05   | 0.05     | 0.05   | 0.05    | 0.05   | 0.05     | 0.05   |

**Table S9.** Summary of the metrics for the Last Glacial Maximum (LGM) simulations for each of the individual models, calculated for the complete range of variables.

| Variable | Metric         | PMIP2 OA |         |        |         |         |         |        | PMIP2 OAV   |              |        | CMIP5 OA |         |           |         |         | CMIP5 OAC |             |  |
|----------|----------------|----------|---------|--------|---------|---------|---------|--------|-------------|--------------|--------|----------|---------|-----------|---------|---------|-----------|-------------|--|
|          |                | CCSM     | CNRM3.3 | ECBILT | FGOALS1 | HadCM3  | IPSL4   | MIROC  | ECHAM (OAV) | HadCM3 (OAV) | CCSM4  | CNRM5    | GISS.E2 | MPI (ESM) | MRI3    | COSMOS  | IPSL5     | MIROC (ESM) |  |
| SSTann   | Median Bias    | -0.02    | 0.33    | 0.22   | -0.62   | -0.48   | -0.49   | -0.1   | -0.93       | -0.81        | -0.46  | 0.61     | -0.24   | -0.19     | -0.7    | NA      | -0.99     | -0.25       |  |
|          | IQR Ratio      | 0.51     | 0.49    | 0.72   | 0.67    | 0.5     | 0.38    | 0.38   | 0.23        | 0.5          | 0.36   | 0.18     | 0.45    | 0.29      | 0.25    | NA      | 0.44      | 0.68        |  |
|          | 1- $\tau$      | 0.77     | 0.88    | 0.72   | 0.74    | 0.79    | 0.84    | 0.9    | 0.92        | 0.77         | 0.85   | 0.96     | 0.83    | 0.9       | 0.76    | NA      | 0.78      | 0.77        |  |
|          | Fuzzy Distance | 1.19     | 1.30    | 1.18   | 1.36    | 1.25    | 1.38    | 1.30   | 1.48        | 1.39         | 1.27   | 1.32     | 1.22    | 1.28      | 1.41    | NA      | 1.50      | 1.25        |  |
| SSTsum   | Median Bias    | -0.18    | 0.38    | 0.11   | -0.88   | -0.51   | -0.38   | -0.08  | -1.01       | -0.81        | -0.52  | 0.67     | -0.52   | -0.2      | -0.73   | NA      | -1        | -0.16       |  |
|          | IQR Ratio      | 0.58     | 0.43    | 0.97   | 1.11    | 0.42    | 0.47    | 0.31   | 0.31        | 0.49         | 0.54   | 0.25     | 0.47    | 0.28      | 0.32    | NA      | 0.55      | 0.59        |  |
|          | 1- $\tau$      | 0.94     | 0.98    | 0.99   | 0.95    | 1       | 0.99    | 1      | 0.99        | 0.99         | 0.99   | 1.03     | 0.97    | 1         | 1.03    | NA      | 0.97      | 1           |  |
|          | Fuzzy Distance | 1.48     | 1.68    | 1.84   | 1.93    | 1.54    | 1.60    | 1.53   | 1.67        | 1.68         | 1.60   | 1.63     | 1.58    | 1.44      | 1.59    | NA      | 1.69      | 1.59        |  |
| SSTwin   | Median Bias    | 0.07     | 0.66    | -0.23  | -0.65   | -0.42   | -0.14   | 0.1    | -0.83       | -0.76        | -0.47  | 0.52     | -0.02   | -0.16     | -0.62   | NA      | -0.55     | -0.18       |  |
|          | IQR Ratio      | 0.58     | 0.53    | 0.86   | 0.93    | 0.47    | 0.6     | 0.31   | 0.33        | 0.51         | 0.38   | 0.33     | 0.35    | 0.37      | 0.37    | NA      | 0.51      | 0.54        |  |
|          | 1- $\tau$      | 0.95     | 1       | 0.97   | 0.95    | 0.99    | 0.98    | 1.01   | 0.95        | 0.98         | 0.97   | 1.02     | 0.95    | 0.95      | 0.98    | NA      | 0.96      | 0.97        |  |
|          | Fuzzy Distance | 1.49     | 1.63    | 1.71   | 1.70    | 1.35    | 1.38    | 1.29   | 1.43        | 1.47         | 1.44   | 1.46     | 1.28    | 1.32      | 1.48    | NA      | 1.50      | 1.42        |  |
| Slnmon   | Median Bias    | 0.81     | -0.69   | 2.31   | 2.31    | 0.31    | NA      | -0.69  | -0.69       | 0.31         | 0.31   | -0.69    | -0.69   | -0.69     | 1.31    | NA      | -0.69     | -0.69       |  |
|          | IQR Ratio      | 2.53     | 0       | 2.11   | 4.22    | 1.27    | NA      | 0      | 2.11        | 1.69         | 2.11   | 0        | 0       | 0.84      | 1.69    | NA      | 1.16      | 0.84        |  |
|          | 1- $\tau$      | 0.72     | 0.95    | 0.71   | 0.88    | 0.78    | NA      | 1.07   | 0.85        | 0.79         | 0.74   | 0.93     | 1.14    | 0.93      | 0.77    | NA      | 0.74      | 0.85        |  |
|          | Fuzzy Distance | 2.53     | NA      | 2.11   | 4.22    | 1.27    | NA      | NA     | 2.11        | 1.69         | 2.11   | NA       | NA      | 0.84      | 1.69    | NA      | 1.16      | 0.84        |  |
| MAT      | Median Bias    | 1.8      | 2.97    | 2.89   | 0.86    | 0.15    | 0.6     | 2.47   | 1.33        | -1.05        | 0.88   | 3.77     | 0.54    | 1.68      | 2.01    | 0.82    | 0.43      | -0.73       |  |
|          | IQR Ratio      | 0.74     | 0.27    | 0.61   | 0.72    | 1.1     | 0.68    | 0.42   | 0.44        | 1.45         | 0.86   | 0.33     | 1.18    | 0.51      | 0.44    | 0.44    | 0.44      | 1.35        |  |
|          | 1- $\tau$      | 0.57     | 1       | 0.85   | 0.7     | 0.75    | 0.68    | 0.6    | 0.89        | 0.76         | 0.7    | 0.67     | 0.77    | 0.71      | 0.71    | 0.73    | 0.65      | 0.73        |  |
|          | Fuzzy Distance | 2.63     | 3.30    | 2.93   | 2.52    | 2.70    | 2.82    | 2.36   | 2.78        | 3.38         | 2.74   | 3.57     | 3.51    | 2.80      | 3.04    | 2.39    | 2.21      | 3.26        |  |
| MTCO     | Median Bias    | 5.17     | 5.78    | 7.29   | 5.62    | 3.37    | 4.14    | 6.23   | 4.53        | 2.9          | 4.61   | 5.9      | 4.11    | 4.36      | 4.52    | 3.12    | 3.23      | 2.44        |  |
|          | IQR Ratio      | 0.94     | 0.32    | 0.26   | 0.69    | 0.85    | 0.53    | 0.53   | 0.39        | 0.94         | 0.92   | 0.62     | 0.69    | 0.7       | 0.78    | 0.32    | 0.43      | 1.03        |  |
|          | 1- $\tau$      | 0.62     | 0.82    | 0.78   | 0.77    | 0.77    | 0.75    | 0.7    | 0.8         | 0.75         | 0.69   | 0.66     | 0.72    | 0.67      | 0.75    | 0.61    | 0.58      | 0.69        |  |
|          | Fuzzy Distance | 4.96     | 5.52    | 6.24   | 5.05    | 4.43    | 4.26    | 4.91   | 4.33        | 4.75         | 4.34   | 4.59     | 5.19    | 4.47      | 3.61    | 4.32    | 4.22      | 4.37        |  |
| MTWA     | Median Bias    | 0.66     | 1.51    | 1.15   | -2.68   | -2.21   | -1.43   | 0.21   | 0.26        | -3.95        | -1.41  | 4.74     | -1.68   | -0.13     | 1.16    | -1      | -0.96     | -2.3        |  |
|          | IQR Ratio      | 0.52     | 0.29    | 0.43   | 0.8     | 0.77    | 0.7     | 0.62   | 0.38        | 0.71         | 0.5    | 0.58     | 0.86    | 0.53      | 0.3     | 0.49    | 0.54      | 0.69        |  |
|          | 1- $\tau$      | 0.81     | 0.9     | 0.81   | 0.92    | 0.66    | 0.64    | 0.69   | 1.04        | 0.63         | 0.72   | 1.18     | 0.97    | 0.7       | 1       | 0.81    | 0.72      | 0.67        |  |
|          | Fuzzy Distance | 3.26     | 4.35    | 3.28   | 4.36    | 3.98    | 3.83    | 3.16   | 4.31        | 5.04         | 3.05   | 6.30     | 4.86    | 3.56      | 4.18    | 3.44    | 3.20      | 3.24        |  |
| GDD5     | Median Bias    | -124.11  | 52.29   | 109.06 | -340.42 | -485.53 | -410.81 | -86.07 | -90.72      | -705.57      | -312.7 | 393.01   | -446.33 | -274.62   | -127.72 | -592.37 | -481.68   | -365.75     |  |
|          | IQR Ratio      | 0.56     | 0.64    | 0.4    | 0.43    | 0.69    | 0.41    | 0.6    | 0.7         | 0.6          | 0.49   | 0.53     | 0.32    | 0.67      | 0.64    | 1.12    | 0.7       | 0.55        |  |
|          | 1- $\tau$      | 0.6      | 0.82    | 0.74   | 0.58    | 0.63    | 0.64    | 0.61   | 0.79        | 0.63         | 0.59   | 0.74     | 0.65    | 0.67      | 0.68    | 0.73    | 0.66      | 0.62        |  |
|          | Fuzzy Distance | 357.33   | 633.98  | 464.76 | 507.93  | 509.07  | 528.69  | 463.43 | 478.09      | 621.61       | 467.06 | 671.54   | 610.52  | 399.02    | 479.12  | 637.89  | 521.39    | 546.36      |  |
| MAP      | Median Bias    | 123.03   | 89.11   | 54.85  | 334.24  | 171.3   | 172.36  | 141.2  | 143.17      | 202.87       | 132.44 | 106.81   | 90.07   | 109.85    | 33.53   | 50.88   | 40.32     | 9.74        |  |
|          | IQR Ratio      | 0.75     | 0.92    | 0.54   | 0.84    | 1.16    | 0.55    | 0.86   | 0.52        | 1.1          | 0.68   | 0.48     | 0.83    | 0.83      | 0.83    | 0.76    | 0.78      | 0.9         |  |
|          | 1- $\tau$      | 1.08     | 1.01    | 0.92   | 1.12    | 1.11    | 1.01    | 1.05   | 1.16        | 1.14         | 1.07   | 0.86     | 0.93    | 0.95      | 0.86    | 0.89    | 0.84      | 0.97        |  |
|          | Fuzzy Distance | 199.35   | 174.60  | 149.05 | 387.37  | 205.58  | 211.32  | 203.95 | 208.64      | 228.00       | 206.18 | 135.91   | 162.74  | 219.73    | 169.63  | 188.58  | 166.17    | 209.67      |  |
| $\alpha$ | Median Bias    | 0.02     | 0.04    | -0.02  | 0.04    | 0.08    | 0.07    | 0.06   | 0.05        | 0.09         | 0.01   | 0.02     | 0.02    | 0.05      | -0.01   | 0.01    | 0         | -0.07       |  |
|          | IQR Ratio      | 2.11     | 3.07    | 2.29   | 2.54    | 2.82    | 1.55    | 2.77   | 2.05        | 3.45         | 2.34   | 2.18     | 4.19    | 2.6       | 3.19    | 2.85    | 3         |             |  |
|          | 1- $\tau$      | 0.77     | 0.76    | 0.83   | 0.81    | 0.83    | 0.72    | 0.79   | 0.86        | 0.88         | 0.75   | 0.74     | 0.74    | 0.79      | 0.81    | 0.81    | 0.73      | 0.83        |  |
|          | Fuzzy Distance | 0.11     | 0.10    | 0.10   | 0.11    | 0.12    | 0.10    | 0.13   | 0.11        | 0.17         | 0.10   | 0.09     | 0.13    | 0.12      | 0.13    | 0.13    | 0.13      | 0.12        |  |



**Table S10.** Summary of the metrics for the simulations for Mid-Holocene (MH) for each of the individual models.

| Variable | Metric         | PMIP2 OA |            |            |           |        |         |        |        |        |        | PMIP2 OA |        |        | PMIP2 OAV       |             |            |              |
|----------|----------------|----------|------------|------------|-----------|--------|---------|--------|--------|--------|--------|----------|--------|--------|-----------------|-------------|------------|--------------|
|          |                | CCSM     | CSIRO3.1.0 | CSIRO3.1.1 | ECBILT.LV | ECHAM  | FGOALS1 | FOAM   | GISS.E | IPSL4  | MIROC  | MRI2fa   | MRI2   | HadCM3 | ECBILT.LV (OAV) | ECHAM (OAV) | FOAM (OAV) | MRI2fa (OAV) |
| SSTann   | Median         | -0.36    | -0.17      | -0.12      | -0.22     | NA     | -0.19   | -0.14  | -0.53  | -0.23  | -0.46  | -0.32    | -0.59  | -0.31  | -0.12           | -0.34       | -0.21      | -0.17        |
|          | Bias           |          |            |            |           |        |         |        |        |        |        |          |        |        |                 |             |            |              |
|          | IQR Ratio      | 0.37     | 0.47       | 0.5        | 0.24      | NA     | 0.4     | 0.31   | 0.56   | 0.46   | 0.33   | 0.3      | 0.25   | 0.35   | 0.33            | 0.22        | 0.22       | 0.33         |
|          | 1- $\tau$      | 0.89     | 0.95       | 1.01       | 0.87      | NA     | 0.98    | 1.02   | 0.9    | 1.07   | 0.96   | 0.93     | 0.78   | 1.12   | 0.86            | 0.82        | 0.88       | 0.89         |
| MAT      | Fuzzy Distance | 0.56     | 0.59       | 0.53       | 0.48      | NA     | 0.57    | 0.55   | 0.74   | 0.55   | 0.61   | 0.58     | 0.75   | 0.50   | 0.45            | 0.48        | 0.59       | 0.53         |
|          | Median         | -0.14    | 0.47       | 0.46       | 0.1       | -0.02  | -0.15   | 0.5    | -0.01  | 0.74   | -0.13  | 0        | -0.55  | 0.04   | 0.33            | 0.02        | 0.19       | 0.13         |
|          | Bias           |          |            |            |           |        |         |        |        |        |        |          |        |        |                 |             |            |              |
|          | IQR Ratio      | 0.17     | 0.23       | 0.26       | 0.16      | 0.16   | 0.18    | 0.25   | 0.29   | 0.17   | 0.2    | 0.21     | 0.14   | 0.2    | 0.17            | 0.16        | 0.37       | 0.22         |
| MTCO     | 1- $\tau$      | 0.97     | 0.94       | 0.9        | 0.91      | 0.93   | 1.07    | 0.95   | 0.91   | 0.87   | 0.96   | 0.88     | 0.99   | 0.99   | 0.9             | 0.96        | 0.92       | 0.87         |
|          | Fuzzy Distance | 1.16     | 1.13       | 1.11       | 1.09      | 1.10   | 1.21    | 1.22   | 1.12   | 1.22   | 1.14   | 1.10     | 1.28   | 1.15   | 1.11            | 1.13        | 1.22       | 1.05         |
|          | Median         | -0.31    | 0.4        | 0.71       | -0.03     | -0.13  | -0.49   | 0.15   | -0.43  | 0.48   | -0.6   | -0.1     | -0.82  | -0.08  | 0.35            | 0.13        | -0.05      | -0.08        |
|          | Bias           |          |            |            |           |        |         |        |        |        |        |          |        |        |                 |             |            |              |
| MTWA     | IQR Ratio      | 0.26     | 0.29       | 0.32       | 0.14      | 0.38   | 0.26    | 0.2    | 0.28   | 0.3    | 0.29   | 0.2      | 0.27   | 0.25   | 0.15            | 0.16        | 0.34       | 0.28         |
|          | 1- $\tau$      | 1.05     | 0.93       | 0.86       | 0.97      | 1.04   | 1.04    | 0.95   | 0.92   | 0.89   | 1.09   | 0.96     | 1      | 0.98   | 0.91            | 0.95        | 0.95       | 1.01         |
|          | Fuzzy Distance | 1.46     | 1.51       | 1.44       | 1.40      | 1.47   | 1.61    | 1.43   | 1.46   | 1.43   | 1.59   | 1.43     | 1.70   | 1.44   | 1.36            | 1.38        | 1.64       | 1.36         |
|          | Median         | 0.98     | 1.44       | 1.41       | 0.56      | 0.99   | 1.76    | 1.8    | 1.02   | 2      | 1.31   | 1.32     | 1.17   | 1.55   | 0.78            | 0.83        | 1.51       | 1.55         |
| GDD5     | Bias           |          |            |            |           |        |         |        |        |        |        |          |        |        |                 |             |            |              |
|          | IQR Ratio      | 0.3      | 0.4        | 0.39       | 0.38      | 0.29   | 0.55    | 0.48   | 0.44   | 0.28   | 0.36   | 0.27     | 0.32   | 0.39   | 0.37            | 0.28        | 0.39       | 0.32         |
|          | 1- $\tau$      | 1.09     | 1.07       | 1.05       | 1.01      | 1.12   | 1.11    | 1.06   | 1.05   | 1.06   | 1.09   | 0.99     | 1.01   | 1.14   | 1               | 1.12        | 1.04       | 1.02         |
|          | Fuzzy Distance | 1.49     | 1.87       | 1.79       | 1.36      | 1.55   | 2.23    | 2.18   | 1.65   | 2.17   | 1.61   | 1.63     | 1.57   | 1.98   | 1.53            | 1.49        | 1.89       | 1.85         |
| MAP      | Median         | -24.87   | 48.6       | 54.15      | -23.9     | -10    | 21.83   | 87.12  | 4.93   | 119.16 | 8.74   | 8.14     | -46.24 | 28.96  | 20.2            | -22.26      | 49.08      | 37.7         |
|          | Bias           |          |            |            |           |        |         |        |        |        |        |          |        |        |                 |             |            |              |
|          | IQR Ratio      | 0.15     | 0.28       | 0.29       | 0.17      | 0.21   | 0.27    | 0.26   | 0.32   | 0.19   | 0.21   | 0.19     | 0.26   | 0.19   | 0.16            | 0.18        | 0.3        | 0.23         |
|          | 1- $\tau$      | 0.98     | 1.02       | 0.99       | 0.92      | 1.09   | 1.19    | 1.01   | 1.02   | 0.91   | 1.04   | 0.86     | 1.07   | 1.09   | 0.89            | 1.08        | 0.96       | 0.94         |
| MAP      | Fuzzy Distance | 195.91   | 196.91     | 199.06     | 199.27    | 210.70 | 228.74  | 210.50 | 198.14 | 228.13 | 199.60 | 184.10   | 206.22 | 200.66 | 203.82          | 205.81      | 199.38     | 191.77       |
|          | Median         | -52.45   | -47.96     | -42.63     | -43.76    | -38.47 | -38.75  | -47.46 | -44.3  | -36.38 | -54.24 | -57.48   | -64.06 | -43.27 | -36.26          | -41.53      | -44.51     | -53.42       |
|          | Bias           |          |            |            |           |        |         |        |        |        |        |          |        |        |                 |             |            |              |
|          | IQR Ratio      | 0.2      | 0.24       | 0.2        | 0.23      | 0.31   | 0.27    | 0.23   | 0.29   | 0.24   | 0.26   | 0.23     | 0.23   | 0.22   | 0.26            | 0.23        | 0.28       | 0.28         |
| $\alpha$ | 1- $\tau$      | 0.95     | 1.07       | 1.07       | 1.03      | 0.77   | 0.94    | 1.1    | 0.98   | 0.92   | 0.89   | 0.89     | 0.84   | 0.96   | 0.91            | 0.8         | 1.03       | 0.88         |
|          | Fuzzy Distance | 92.99    | 98.62      | 86.63      | 95.02     | 76.03  | 82.74   | 93.73  | 94.23  | 81.53  | 91.75  | 92.75    | 92.35  | 85.29  | 84.01           | 77.54       | 95.40      | 87.92        |
|          | Median         | -0.03    | -0.04      | -0.04      | -0.02     | -0.01  | -0.02   | -0.03  | -0.04  | -0.04  | -0.04  | -0.04    | -0.04  | -0.03  | -0.01           | -0.02       | -0.02      | -0.03        |
|          | Bias           |          |            |            |           |        |         |        |        |        |        |          |        |        |                 |             |            |              |
| $\alpha$ | IQR Ratio      | 0.5      | 0.94       | 0.84       | 0.57      | 0.52   | 0.63    | 0.82   | 0.84   | 0.76   | 0.75   | 0.77     | 0.74   | 0.8    | 0.6             | 0.48        | 0.8        | 0.85         |
|          | 1- $\tau$      | 1        | 1.03       | 1          | 0.99      | 0.88   | 0.92    | 1.09   | 0.99   | 0.86   | 0.96   | 0.96     | 0.93   | 0.98   | 0.91            | 0.88        | 1.06       | 0.92         |
|          | Fuzzy Distance | 0.05     | 0.06       | 0.06       | 0.05      | 0.04   | 0.05    | 0.06   | 0.06   | 0.05   | 0.06   | 0.05     | 0.06   | 0.06   | 0.04            | 0.04        | 0.06       | 0.06         |
|          | Bias           |          |            |            |           |        |         |        |        |        |        |          |        |        |                 |             |            |              |

Table S10 continued.

| Variable | Metric         | PMIP2 OAV  |              | CMIP5 OA |        |          |        |           |         |         |           |        |             | CMIP5 OAC |              |               |        |             |
|----------|----------------|------------|--------------|----------|--------|----------|--------|-----------|---------|---------|-----------|--------|-------------|-----------|--------------|---------------|--------|-------------|
|          |                | MRI2 (OAV) | HadCM3 (OAV) | CCSM4    | CNRM5  | CSIRO3.6 | EARTH  | FGOALSG 2 | FGOALS2 | GISS.E2 | MPI (ESM) | MRI3   | CSIRO3.1. 2 | BCC       | HadGEM2 (CC) | HadGEM2 (ESM) | IPSL5  | MIROC (ESM) |
| SSTann   | Median Bias    | -0.07      | -0.31        | -0.39    | -0.09  | -0.21    | NA     | NA        | NA      | -0.28   | -0.3      | -0.27  | -0.24       | -0.41     | -0.06        | -0.08         | -0.26  | -0.59       |
|          | IQR Ratio      | 0.34       | 0.38         | 0.17     | 0.48   | 0.42     | NA     | NA        | NA      | 0.4     | 0.45      | 0.46   | 0.33        | 0.41      | 0.42         | 0.49          | 0.45   | 0.26        |
|          | 1-Tau          | 0.9        | 0.98         | 0.93     | 0.98   | 0.97     | NA     | NA        | NA      | 0.84    | 0.84      | 0.86   | 1.03        | 0.94      | 0.89         | 1.03          | 0.9    | 0.95        |
|          | Fuzzy Distance | 0.52       | 0.58         | 0.60     | 0.55   | 0.57     | NA     | NA        | NA      | 0.59    | 0.57      | 0.52   | 0.63        | 0.64      | 0.49         | 0.56          | 0.52   | 0.71        |
| MAT      | Median Bias    | 0.56       | 0.27         | -0.51    | 0.48   | 0.2      | 0.01   | -0.75     | 0       | -0.07   | 0.01      | 0.04   | 0.19        | 0.01      | 0.6          | 0.64          | 0.03   | -0.55       |
|          | IQR Ratio      | 0.46       | 0.2          | 0.21     | 0.21   | 0.24     | 0.25   | 0.18      | 0.21    | 0.23    | 0.16      | 0.14   | 0.16        | 0.24      | 0.35         | 0.28          | 0.16   | 0.27        |
|          | 1-Tau          | 0.94       | 0.9          | 0.91     | 0.88   | 0.9      | 0.94   | 0.94      | 0.93    | 0.9     | 0.95      | 0.93   | 0.93        | 0.92      | 0.91         | 0.93          | 0.91   | 0.94        |
|          | Fuzzy Distance | 1.42       | 1.09         | 1.18     | 1.23   | 1.05     | 1.11   | 1.38      | 1.11    | 1.09    | 1.12      | 1.09   | 1.08        | 1.10      | 1.23         | 1.20          | 1.10   | 1.28        |
| MTCO     | Median Bias    | 0.4        | 0.15         | -1.07    | 0.76   | 0.07     | 0.21   | -0.91     | -0.05   | 0.21    | -0.12     | -0.26  | 0.15        | -0.18     | 0.76         | 0.51          | -0.21  | -0.79       |
|          | IQR Ratio      | 0.3        | 0.32         | 0.31     | 0.3    | 0.34     | 0.33   | 0.15      | 0.34    | 0.24    | 0.25      | 0.22   | 0.19        | 0.31      | 0.56         | 0.31          | 0.29   | 0.31        |
|          | 1-Tau          | 0.95       | 0.9          | 1.1      | 0.87   | 0.92     | 0.86   | 0.99      | 0.89    | 0.91    | 0.92      | 1.08   | 0.94        | 0.95      | 0.92         | 0.95          | 0.96   | 1.06        |
|          | Fuzzy Distance | 1.60       | 1.34         | 1.91     | 1.81   | 1.38     | 1.68   | 1.65      | 1.34    | 1.40    | 1.43      | 1.50   | 1.37        | 1.44      | 1.81         | 1.51          | 1.41   | 1.69        |
| MTWA     | Median Bias    | 2.27       | 1.57         | 1.24     | 1.69   | 1.38     | 0.92   | 0.6       | 1.12    | 0.78    | 1.08      | 1.08   | 1.27        | 1.28      | 0.97         | 1.79          | 1.28   | 0.82        |
|          | IQR Ratio      | 0.54       | 0.44         | 0.35     | 0.22   | 0.5      | 0.41   | 0.3       | 0.47    | 0.32    | 0.31      | 0.29   | 0.42        | 0.45      | 0.37         | 0.52          | 0.3    | 0.34        |
|          | 1-Tau          | 1          | 1.03         | 1.04     | 1.06   | 1.05     | 1.02   | 1.11      | 1.07    | 1.08    | 1.03      | 1.18   | 1.05        | 1.05      | 0.97         | 0.93          | 0.99   | 1.06        |
|          | Fuzzy Distance | 2.51       | 2.02         | 1.59     | 1.98   | 1.99     | 1.48   | 1.35      | 1.61    | 1.33    | 1.56      | 1.59   | 1.75        | 1.80      | 1.57         | 2.20          | 1.59   | 1.46        |
| GDD5     | Median Bias    | 148.31     | 55.19        | -25.98   | 83.41  | 33.65    | -37.33 | -106.45   | -15.68  | -15.39  | -2.43     | 3.77   | 22.46       | 5.51      | 59.4         | 88.77         | 19.2   | -72.07      |
|          | IQR Ratio      | 0.57       | 0.2          | 0.21     | 0.17   | 0.29     | 0.27   | 0.26      | 0.22    | 0.31    | 0.22      | 0.15   | 0.23        | 0.25      | 0.34         | 0.36          | 0.18   | 0.27        |
|          | 1-Tau          | 1.01       | 0.97         | 0.98     | 0.95   | 0.99     | 1      | 0.98      | 1       | 0.93    | 1.07      | 1.15   | 1.05        | 1         | 0.88         | 0.9           | 0.89   | 0.97        |
|          | Fuzzy Distance | 278.94     | 193.92       | 209.11   | 229.71 | 200.83   | 190.37 | 223.19    | 201.54  | 199.29  | 201.84    | 209.63 | 195.33      | 197.42    | 204.64       | 231.52        | 188.24 | 215.77      |
| MAP      | Median Bias    | -32.12     | -44.79       | -68.97   | -40.32 | -59.81   | -47.27 | -83.09    | -46.92  | -39.03  | -45.81    | -49.04 | -46.56      | -54.61    | -48.66       | -46.37        | -44.54 | -74.01      |
|          | IQR Ratio      | 0.38       | 0.29         | 0.26     | 0.24   | 0.26     | 0.27   | 0.21      | 0.19    | 0.38    | 0.35      | 0.22   | 0.23        | 0.17      | 0.39         | 0.35          | 0.23   | 0.34        |
|          | 1-Tau          | 0.87       | 1.01         | 0.87     | 0.82   | 1        | 0.89   | 0.89      | 0.94    | 0.91    | 0.82      | 0.82   | 1.04        | 1.06      | 0.87         | 0.87          | 0.95   | 0.93        |
|          | Fuzzy Distance | 76.57      | 94.75        | 101.22   | 84.20  | 99.70    | 90.40  | 109.71    | 83.18   | 84.46   | 80.80     | 84.60  | 93.57       | 96.91     | 87.95        | 86.15         | 85.76  | 99.27       |
| $\alpha$ | Median Bias    | -0.02      | -0.03        | -0.04    | -0.02  | -0.05    | -0.03  | -0.04     | -0.03   | -0.02   | -0.03     | -0.03  | -0.04       | -0.03     | -0.03        | -0.04         | -0.03  | -0.05       |
|          | IQR Ratio      | 1.02       | 0.94         | 0.86     | 0.66   | 1.15     | 0.81   | 0.7       | 0.52    | 0.78    | 0.82      | 0.58   | 0.9         | 0.67      | 0.89         | 1.3           | 0.71   | 0.9         |
|          | 1-Tau          | 0.91       | 1            | 0.93     | 0.87   | 1        | 0.94   | 0.95      | 0.95    | 0.85    | 0.82      | 0.98   | 1           | 1.01      | 0.98         | 0.97          | 0.95   | 1           |
|          | Fuzzy Distance | 0.05       | 0.05         | 0.06     | 0.04   | 0.07     | 0.05   | 0.06      | 0.05    | 0.04    | 0.05      | 0.05   | 0.06        | 0.05      | 0.06         | 0.06          | 0.05   | 0.07        |
